# Supplementary material for: Comparison and Gas Loading Impact on Counter- and Concurrent Trickle-Bed Reactor Configurations for Ex-Situ Biomethanation
Source: Research Square preprint supplement (doi:10.21203/rs.3.rs-989066/v1), 2021-10-25
Supplement: Supplementary file 1 [file 39c1dc892686c87fb486ff22.docx]

| **Order** | **Family** | **Genus** | **Counter-current TBR (day)** | | | | | **Concurrent TBR (day)** | | | | | | |
| --- | --- | --- | --- | --- | --- | --- | --- | --- | --- | --- | --- | --- | --- | --- |
| **1** | **10** | **25** | **35** | **45** | **1** | **10** | **15** | **20** | **25** | **35** | **45** |
| o__Thermoanaerobacterales | f__Thermoanaerobacteraceae | g__Syntrophaceticus | 4 | 2 | 2 | 17 | 3 | 0 | 1 | 0 | 3 | 3 | 5 | 5 |
| o__Rhizobiales | f__Xanthobacteraceae | g__Variibacter | 0 | 0 | 0 | 0 | 0 | 0 | 0 | 0 | 0 | 0 | 0 | 0 |
| o__Clostridiales | f__Peptococcaceae | g__Desulfitibacter | 0 | 1 | 0 | 0 | 0 | 0 | 0 | 1 | 0 | 0 | 0 | 0 |
| - | - | - | 9 | 13 | 1 | 2 | 8 | 5 | 9 | 8 | 16 | 6 | 5 | 13 |
| o__Clostridiales | f__Lachnospiraceae | g__Mobilitalea | 17 | 9 | 2 | 4 | 4 | 7 | 5 | 12 | 31 | 49 | 10 | 6 |
| o__Clostridiales | f__Family XIV | g__uncultured | 1 | 0 | 1 | 1 | 3 | 0 | 0 | 0 | 0 | 0 | 1 | 0 |
| o__Pseudomonadales | f__Pseudomonadaceae | g__Pseudomonas | 2 | 3 | 0 | 1 | 0 | 41 | 45 | 50 | 40 | 11 | 1 | 1 |
| o__Clostridiales | f__Ruminococcaceae | g__Fastidiosipila | 633 | 529 | 258 | 241 | 97 | 625 | 471 | 394 | 493 | 475 | 306 | 211 |
| o__Clostridiales | f__Clostridiales Incertae Sedis | g__Proteiniborus | 16 | 9 | 12 | 7 | 1 | 24 | 54 | 44 | 60 | 39 | 20 | 6 |
| o__Hydrogenisporales | f__MBA03 | g__ | 0 | 2 | 0 | 0 | 0 | 1 | 1 | 2 | 4 | 2 | 0 | 1 |
| o__Synergistales | f__Synergistaceae | g__uncultured | 5 | 1 | 3 | 3 | 1 | 0 | 0 | 2 | 7 | 7 | 2 | 5 |
| o__Hydrogenisporales | f__Hydrogenisporaceae | g__ | 2 | 3 | 0 | 0 | 1 | 6 | 5 | 3 | 0 | 1 | 0 | 1 |
| o__Clostridiales | f__Family XI | g__Tissierella | 2 | 3 | 13 | 1 | 1 | 0 | 4 | 17 | 28 | 39 | 12 | 24 |
| - | - | - | 0 | 0 | 0 | 0 | 1 | 0 | 0 | 0 | 0 | 0 | 0 | 0 |
| o__Clostridiales | f__Syntrophomonadaceae | g__uncultured | 0 | 0 | 0 | 0 | 1 | 0 | 0 | 1 | 0 | 1 | 0 | 0 |
| o__Pseudomonadales | f__Pseudomonadaceae | g__Pseudomonas | 0 | 0 | 1 | 0 | 0 | 3 | 0 | 0 | 0 | 0 | 0 | 0 |
| o__Campylobacterales | f__Campylobacteraceae | g__Arcobacter | 1 | 0 | 0 | 0 | 0 | 0 | 0 | 0 | 0 | 0 | 0 | 0 |
| o__D8A-2 | f__MRE50b23 | g__B55_F | 294 | 358 | 263 | 394 | 109 | 90 | 334 | 272 | 421 | 405 | 272 | 389 |
| - | - | - | 6 | 2 | 1 | 4 | 0 | 0 | 0 | 0 | 7 | 2 | 1 | 2 |
| o__Clostridiales | f__Family XIII | g__[Eubacterium] nodatum group | 5 | 4 | 0 | 4 | 0 | 4 | 3 | 2 | 3 | 2 | 2 | 4 |
| o__Clostridiales | f__Christensenellaceae | g__Christensenellaceae R-7 group | 6 | 2 | 0 | 3 | 3 | 5 | 3 | 0 | 1 | 10 | 3 | 4 |
| o__Clostridiales | f__Ruminococcaceae | g__Ruminiclostridium 1 | 22 | 38 | 8 | 6 | 3 | 33 | 41 | 64 | 44 | 27 | 19 | 31 |
| o__Clostridiales | f__Ruminococcaceae | g__uncultured | 1 | 1 | 0 | 1 | 0 | 1 | 2 | 2 | 7 | 10 | 4 | 8 |
| o__Methanobacteriales | f__Methanobacteriaceae | g__Methanobacterium | 656 | 713 | 875 | 1392 | 1024 | 224 | 417 | 411 | 523 | 508 | 347 | 441 |
| o__Anaerolineales | f__Anaerolineaceae | g__T78 | 0 | 0 | 0 | 0 | 0 | 0 | 0 | 1 | 0 | 0 | 0 | 0 |
| o__Clostridiales | f__Clostridiaceae 1 | g__uncultured | 0 | 0 | 0 | 0 | 0 | 0 | 0 | 0 | 0 | 0 | 1 | 0 |
| o__Acholeplasmatales | f__Acholeplasmataceae | g__Acholeplasma | 2 | 1 | 0 | 0 | 1 | 11 | 4 | 2 | 5 | 3 | 1 | 0 |
| o__Clostridiales | f__Peptococcaceae | g__Desulfitibacter | 2 | 11 | 8 | 5 | 1 | 20 | 16 | 5 | 1 | 8 | 3 | 26 |
| o__Hydrogenisporales | f__MBA03 | g__ | 1 | 7 | 0 | 1 | 1 | 9 | 33 | 11 | 18 | 8 | 4 | 9 |
| o__Clostridiales | f__Christensenellaceae | g__uncultured | 0 | 2 | 0 | 0 | 0 | 0 | 0 | 0 | 0 | 0 | 0 | 0 |
| o__Hydrogenisporales | f__Hydrogenisporaceae | g__ | 0 | 0 | 0 | 0 | 0 | 0 | 0 | 0 | 0 | 0 | 0 | 0 |
| o__Clostridiales | f__Ruminococcaceae | g__Papillibacter | 0 | 0 | 0 | 0 | 0 | 0 | 0 | 0 | 1 | 1 | 0 | 1 |
| o__Clostridiales | f__Caldicoprobacteraceae | g__Caldicoprobacter | 18 | 3 | 1 | 2 | 1 | 3 | 1 | 2 | 1 | 4 | 3 | 9 |
| - | - | - | 0 | 0 | 0 | 0 | 0 | 0 | 0 | 0 | 2 | 0 | 0 | 0 |
| o__Methanomicrobiales | f__Methanomicrobiaceae | g__Methanoculleus | 0 | 0 | 1 | 1 | 3 | 0 | 0 | 0 | 0 | 0 | 0 | 1 |
| o__Clostridiales | f__Ruminococcaceae | g__Ruminococcaceae UCG-005 | 0 | 0 | 0 | 0 | 0 | 0 | 2 | 0 | 0 | 0 | 0 | 0 |
| o__Micrococcales | f__Micrococcaceae | g__Enteractinococcus | 34 | 27 | 13 | 12 | 24 | 33 | 32 | 18 | 14 | 13 | 6 | 12 |
| o__Clostridiales | f__Peptococcaceae | g__Sporotomaculum | 5 | 4 | 3 | 0 | 3 | 0 | 0 | 0 | 0 | 2 | 0 | 1 |
| o__Clostridiales | f__Ruminococcaceae | g__Ruminococcaceae UCG-012 | 34 | 16 | 0 | 1 | 5 | 25 | 12 | 14 | 10 | 9 | 2 | 3 |
| o__Clostridiales | f__Family XIII | g__Family XIII AD3011 group | 8 | 8 | 8 | 11 | 4 | 7 | 7 | 9 | 7 | 15 | 7 | 3 |
| o__Fibrobacterales | f__Fibrobacteraceae | g__Fibrobacter | 1 | 0 | 0 | 0 | 0 | 0 | 4 | 1 | 0 | 0 | 0 | 1 |
| o__Sphingobacteriales | f__Saprospiraceae | g__CYCU-0281 | 0 | 0 | 0 | 0 | 0 | 0 | 0 | 0 | 1 | 0 | 0 | 0 |
| o__Coriobacteriales | f__Coriobacteriaceae | g__uncultured | 0 | 0 | 0 | 0 | 0 | 0 | 0 | 0 | 0 | 0 | 1 | 2 |
| o__Micrococcales | f__Micrococcaceae | g__Arthrobacter | 10 | 2 | 3 | 0 | 2 | 3 | 1 | 0 | 1 | 0 | 2 | 0 |
| o__Acholeplasmatales | f__Acholeplasmataceae | g__Acholeplasma | 0 | 6 | 0 | 1 | 1 | 18 | 4 | 1 | 1 | 0 | 1 | 1 |
| o__Micrococcales | f__Bogoriellaceae | g__Georgenia | 2 | 1 | 1 | 1 | 0 | 1 | 1 | 0 | 0 | 0 | 0 | 0 |
| o__Clostridiales | f__Ruminococcaceae | g__Fastidiosipila | 0 | 0 | 0 | 0 | 0 | 0 | 2 | 0 | 0 | 0 | 0 | 0 |
| o__Micrococcales | f__Micrococcaceae | g__Nesterenkonia | 1 | 1 | 0 | 0 | 1 | 1 | 1 | 1 | 0 | 1 | 0 | 0 |
| o__Selenomonadales | f__uncultured | g__ | 5 | 4 | 1 | 1 | 4 | 5 | 6 | 3 | 7 | 3 | 7 | 3 |
| o__Clostridiales | f__Clostridiaceae 1 | g__Proteiniclasticum | 10 | 6 | 1 | 1 | 9 | 13 | 8 | 7 | 5 | 5 | 4 | 7 |
| o__Clostridiales | f__Lachnospiraceae | g__Mobilitalea | 41 | 41 | 16 | 6 | 3 | 55 | 39 | 34 | 26 | 28 | 10 | 8 |
| o__Clostridiales | f__Ruminococcaceae | g__Fastidiosipila | 5 | 7 | 9 | 11 | 41 | 0 | 0 | 0 | 1 | 5 | 6 | 10 |
| o__Clostridiales | f__Family XI | g__uncultured | 0 | 0 | 3 | 1 | 0 | 19 | 33 | 30 | 59 | 58 | 8 | 2 |
| o__Clostridiales | f__Ruminococcaceae | g__Subdoligranulum | 0 | 0 | 1 | 0 | 0 | 0 | 0 | 0 | 0 | 0 | 0 | 1 |
| o__Synergistales | f__Synergistaceae | g__uncultured | 21 | 35 | 40 | 37 | 31 | 2 | 9 | 9 | 17 | 30 | 35 | 32 |
| o__Hydrogenisporales | f__Hydrogenisporaceae | g__ | 145 | 110 | 16 | 20 | 24 | 43 | 105 | 102 | 85 | 72 | 52 | 71 |
| o__Erysipelotrichales | f__Erysipelotrichaceae | g__Turicibacter | 127 | 101 | 68 | 88 | 82 | 159 | 115 | 84 | 107 | 70 | 64 | 96 |
| o__Bacteroidales | f__Porphyromonadaceae | g__Petrimonas | 62 | 39 | 7 | 9 | 10 | 88 | 64 | 49 | 55 | 40 | 17 | 8 |
| o__Clostridiales | f__Family XIII | g__[Eubacterium] nodatum group | 2 | 1 | 5 | 1 | 5 | 5 | 2 | 2 | 3 | 6 | 2 | 0 |
| o__Halanaerobiales | f__Halanaerobiaceae | g__Halocella | 17 | 10 | 3 | 2 | 1 | 44 | 8 | 5 | 7 | 8 | 4 | 7 |
| o__Bacillales | f__Planococcaceae | g__Rummeliibacillus | 1 | 0 | 1 | 2 | 0 | 0 | 0 | 0 | 0 | 0 | 0 | 0 |
| o__Bacteroidales | f__Bacteroidales UCG-001 | g__ | 22 | 20 | 10 | 5 | 65 | 6 | 7 | 35 | 67 | 117 | 18 | 13 |
| o__Flavobacteriales | f__Flavobacteriaceae | g__NS2b marine group | 1 | 0 | 0 | 0 | 0 | 0 | 0 | 2 | 0 | 0 | 0 | 0 |
| o__Clostridiales | f__Ruminococcaceae | g__uncultured | 0 | 0 | 0 | 1 | 0 | 0 | 0 | 1 | 0 | 0 | 0 | 1 |
| o__Bacillales | f__Bacillaceae | g__Bacillus | 2 | 4 | 1 | 4 | 5 | 17 | 13 | 6 | 12 | 4 | 4 | 5 |
| o__Clostridiales | f__Family XI | g__Sedimentibacter | 0 | 0 | 0 | 1 | 0 | 0 | 1 | 0 | 0 | 2 | 0 | 0 |
| o__Clostridiales | f__Ruminococcaceae | g__Hydrogenoanaerobacterium | 0 | 0 | 0 | 0 | 0 | 0 | 2 | 1 | 0 | 1 | 0 | 0 |
| o__Acholeplasmatales | f__Acholeplasmataceae | g__Acholeplasma | 0 | 0 | 0 | 0 | 0 | 4 | 0 | 0 | 1 | 0 | 0 | 0 |
| o__Erysipelotrichales | f__Erysipelotrichaceae | g__Turicibacter | 0 | 0 | 1 | 0 | 0 | 0 | 1 | 0 | 3 | 1 | 1 | 0 |
| o__Thermoanaerobacterales | f__Family III | g__Tepidanaerobacter | 2 | 8 | 4 | 6 | 4 | 3 | 5 | 11 | 8 | 21 | 6 | 2 |
| o__Clostridiales | f__Family XIII | g__Anaerovorax | 0 | 0 | 0 | 0 | 1 | 1 | 0 | 0 | 0 | 0 | 0 | 0 |
| o__Rhizobiales | f__Nordellaceae | g__MNG7 | 0 | 0 | 0 | 0 | 0 | 0 | 0 | 0 | 0 | 0 | 0 | 1 |
| o__Clostridiales | f__Peptostreptococcaceae | g__Peptoclostridium | 8 | 6 | 2 | 2 | 7 | 4 | 3 | 3 | 2 | 2 | 1 | 7 |
| o__Clostridiales | f__Christensenellaceae | g__Christensenellaceae R-7 group | 1 | 0 | 0 | 0 | 0 | 0 | 0 | 0 | 0 | 0 | 0 | 0 |
| - | - | - | 1 | 2 | 0 | 0 | 0 | 0 | 0 | 0 | 0 | 0 | 0 | 0 |
| o__Clostridiales | f__Caldicoprobacteraceae | g__Caldicoprobacter | 1 | 4 | 0 | 0 | 1 | 0 | 1 | 1 | 1 | 0 | 0 | 1 |
| - | - | - | 0 | 0 | 0 | 2 | 3 | 3 | 1 | 1 | 0 | 1 | 2 | 3 |
| o__Clostridiales | f__Lachnospiraceae | g__Mobilitalea | 5 | 8 | 1 | 2 | 3 | 12 | 6 | 3 | 6 | 4 | 1 | 1 |
| o__Coriobacteriales | f__Coriobacteriaceae | g__Atopobium | 7 | 3 | 0 | 1 | 0 | 5 | 4 | 3 | 0 | 1 | 1 | 2 |
| o__Clostridiales | f__Lachnospiraceae | g__Lachnospiraceae NK3A20 group | 1 | 3 | 0 | 0 | 3 | 5 | 3 | 3 | 4 | 2 | 0 | 1 |
| o__Clostridiales | f__Christensenellaceae | g__Christensenellaceae R-7 group | 2 | 1 | 0 | 0 | 3 | 3 | 0 | 0 | 2 | 0 | 0 | 1 |
| o__Clostridiales | f__Family XIII | g__Family XIII UCG-002 | 0 | 1 | 0 | 0 | 3 | 0 | 1 | 0 | 0 | 0 | 1 | 1 |
| o__Clostridiales | f__Christensenellaceae | g__Christensenellaceae R-7 group | 0 | 0 | 0 | 1 | 1 | 0 | 0 | 2 | 0 | 0 | 0 | 0 |
| o__Selenomonadales | f__uncultured | g__ | 11 | 3 | 8 | 17 | 8 | 30 | 38 | 27 | 29 | 27 | 18 | 23 |
| o__Clostridiales | f__Caldicoprobacteraceae | g__Caldicoprobacter | 0 | 0 | 0 | 0 | 1 | 0 | 0 | 0 | 0 | 0 | 0 | 0 |
| o__Coriobacteriales | f__Coriobacteriaceae | g__uncultured | 6 | 5 | 6 | 5 | 7 | 23 | 16 | 9 | 14 | 13 | 4 | 5 |
| o__Coriobacteriales | f__Coriobacteriaceae | g__Olsenella | 4 | 3 | 1 | 1 | 1 | 2 | 0 | 0 | 2 | 4 | 1 | 1 |
| o__Hydrogenisporales | f__MBA03 | g__ | 644 | 624 | 79 | 194 | 308 | 339 | 691 | 454 | 672 | 649 | 376 | 397 |
| o__Pseudomonadales | f__Pseudomonadaceae | g__Pseudomonas | 0 | 0 | 0 | 0 | 0 | 0 | 0 | 0 | 0 | 0 | 0 | 0 |
| o__Clostridiales | f__Family XIII | g__[Eubacterium] nodatum group | 0 | 0 | 1 | 0 | 0 | 0 | 0 | 0 | 3 | 0 | 0 | 0 |
| o__Coriobacteriales | f__Coriobacteriaceae | g__Atopobium | 1 | 4 | 1 | 0 | 2 | 3 | 0 | 0 | 2 | 3 | 0 | 2 |
| o__Clostridiales | f__Eubacteriaceae | g__Garciella | 0 | 0 | 0 | 0 | 2 | 1 | 1 | 1 | 0 | 0 | 0 | 4 |
| o__Hydrogenisporales | f__Hydrogenisporaceae | g__ | 1 | 0 | 0 | 0 | 0 | 0 | 0 | 3 | 0 | 1 | 0 | 0 |
| o__OCS116 clade | f__ | g__ | 0 | 0 | 0 | 0 | 0 | 0 | 0 | 3 | 0 | 0 | 0 | 0 |
| - | - | - | 0 | 0 | 0 | 1 | 0 | 0 | 0 | 0 | 0 | 0 | 1 | 3 |
| o__Clostridiales | f__Christensenellaceae | g__Christensenellaceae R-7 group | 2 | 1 | 10 | 12 | 16 | 0 | 0 | 1 | 2 | 3 | 2 | 0 |
| - | - | - | 0 | 3 | 1 | 0 | 2 | 0 | 1 | 1 | 1 | 1 | 0 | 0 |
| o__Clostridiales | f__Christensenellaceae | g__Christensenellaceae R-7 group | 0 | 0 | 1 | 0 | 0 | 1 | 2 | 0 | 0 | 0 | 0 | 0 |
| o__Actinomycetales | f__Actinomycetaceae | g__Actinomyces | 4 | 6 | 0 | 3 | 2 | 5 | 4 | 2 | 3 | 2 | 1 | 2 |
| o__Thermoplasmatales | f__Thermoplasmatales Incertae Sedis | g__Methanomassiliicoccus | 0 | 0 | 0 | 0 | 1 | 0 | 0 | 0 | 1 | 2 | 1 | 0 |
| o__Clostridiales | f__Lachnospiraceae |  | 2 | 0 | 0 | 0 | 0 | 0 | 0 | 0 | 0 | 0 | 0 | 0 |
| o__Methanobacteriales | f__Methanobacteriaceae | g__Methanobacterium | 0 | 1 | 1 | 2 | 5 | 0 | 0 | 0 | 0 | 0 | 0 | 0 |
| o__Clostridiales | f__Family XI | g__Sedimentibacter | 9 | 19 | 18 | 27 | 105 | 1 | 5 | 9 | 37 | 45 | 32 | 38 |
| o__vadinHA17 | f__ | g__ | 0 | 0 | 0 | 0 | 8 | 0 | 0 | 0 | 0 | 0 | 0 | 0 |
| o__Clostridiales | f__Ruminococcaceae | g__Fastidiosipila | 0 | 3 | 0 | 1 | 1 | 4 | 3 | 2 | 5 | 2 | 1 | 1 |
| o__Clostridiales | f__Ruminococcaceae | g__uncultured | 0 | 0 | 0 | 0 | 0 | 1 | 0 | 0 | 0 | 2 | 0 | 0 |
| o__Clostridiales | f__Lachnospiraceae | g__[Eubacterium] hallii group | 0 | 0 | 0 | 0 | 0 | 0 | 0 | 1 | 1 | 1 | 0 | 0 |
| - | - | - | 0 | 0 | 0 | 0 | 1 | 0 | 0 | 0 | 0 | 0 | 0 | 0 |
| o__Clostridiales | f__Family XI | g__Tissierella | 0 | 1 | 0 | 0 | 0 | 1 | 2 | 0 | 3 | 2 | 0 | 0 |
| o__Clostridiales | f__Ruminococcaceae | g__Fastidiosipila | 1 | 3 | 0 | 2 | 0 | 2 | 2 | 2 | 2 | 1 | 2 | 1 |
| o__Spirochaetales | f__Spirochaetaceae | g__Treponema 2 | 0 | 1 | 0 | 0 | 0 | 1 | 0 | 0 | 0 | 0 | 0 | 0 |
| o__Clostridiales | f__Ruminococcaceae | g__uncultured | 0 | 0 | 0 | 1 | 2 | 0 | 0 | 4 | 0 | 0 | 0 | 1 |
| - | - | - | 0 | 0 | 1 | 0 | 0 | 0 | 0 | 0 | 0 | 0 | 0 | 0 |
| o__Clostridiales | f__Ruminococcaceae | g__Fastidiosipila | 2 | 0 | 0 | 0 | 0 | 1 | 0 | 0 | 0 | 2 | 0 | 0 |
| o__Clostridiales | f__Ruminococcaceae | g__Fastidiosipila | 2 | 5 | 1 | 3 | 0 | 3 | 3 | 0 | 1 | 1 | 0 | 0 |
| o__Thermoanaerobacterales | f__Thermoanaerobacteraceae | g__Gelria | 1 | 6 | 0 | 2 | 1 | 0 | 0 | 0 | 1 | 1 | 0 | 2 |
| o__Clostridiales | f__Ruminococcaceae | g__Ruminococcaceae NK4A214 group | 3 | 6 | 1 | 1 | 1 | 29 | 8 | 8 | 11 | 6 | 0 | 0 |
| o__Xanthomonadales | f__Xanthomonadaceae | g__Ignatzschineria | 35 | 2 | 3 | 4 | 0 | 13 | 13 | 10 | 12 | 4 | 3 | 15 |
| o__Corynebacteriales | f__Nocardiaceae | g__Rhodococcus | 0 | 0 | 4 | 7 | 18 | 0 | 1 | 4 | 2 | 4 | 3 | 4 |
| o__Clostridiales | f__Peptococcaceae | g__Desulfitibacter | 0 | 0 | 0 | 0 | 0 | 0 | 0 | 1 | 0 | 0 | 0 | 0 |
| o__Lactobacillales | f__Carnobacteriaceae | g__uncultured | 295 | 320 | 162 | 197 | 242 | 534 | 348 | 222 | 238 | 230 | 165 | 121 |
| o__Clostridiales | f__Family XIII | g__Anaerovorax | 3 | 0 | 3 | 1 | 10 | 2 | 3 | 4 | 11 | 5 | 8 | 8 |
| o__Clostridiales | f__Syntrophomonadaceae | g__Dethiobacter | 1 | 1 | 0 | 1 | 0 | 0 | 1 | 0 | 0 | 1 | 1 | 0 |
| o__Clostridiales | f__Christensenellaceae | g__Christensenellaceae R-7 group | 5 | 5 | 1 | 4 | 2 | 5 | 3 | 1 | 0 | 3 | 2 | 2 |
| o__Clostridiales | f__Family XIII | g__Family XIII AD3011 group | 30 | 28 | 13 | 19 | 16 | 40 | 34 | 26 | 32 | 23 | 19 | 19 |
| o__Coriobacteriales | f__Coriobacteriaceae |  | 0 | 1 | 1 | 0 | 0 | 0 | 1 | 0 | 0 | 0 | 1 | 5 |
| o__Selenomonadales | f__uncultured | g__ | 0 | 0 | 0 | 0 | 0 | 0 | 0 | 1 | 0 | 0 | 0 | 0 |
| o__Clostridiales | f__Family XI | g__Tepidimicrobium | 1 | 1 | 0 | 0 | 0 | 1 | 0 | 4 | 3 | 0 | 0 | 0 |
| o__Bacteroidales | f__Marinilabiaceae | g__uncultured | 1 | 2 | 1 | 6 | 10 | 0 | 3 | 6 | 28 | 51 | 35 | 18 |
| o__Clostridiales | f__Ruminococcaceae | g__[Eubacterium] coprostanoligenes group | 6 | 6 | 4 | 2 | 0 | 1 | 5 | 9 | 20 | 18 | 13 | 2 |
| o__Synergistales | f__Synergistaceae | g__uncultured | 0 | 0 | 3 | 13 | 16 | 0 | 0 | 0 | 0 | 0 | 1 | 0 |
| o__Bacillales | f__Planococcaceae | g__uncultured | 3 | 3 | 0 | 0 | 1 | 3 | 1 | 1 | 3 | 1 | 4 | 52 |
| o__Clostridiales | f__Syntrophomonadaceae | g__Dethiobacter | 14 | 5 | 2 | 2 | 2 | 12 | 1 | 7 | 14 | 2 | 2 | 5 |
| o__Actinomycetales | f__Actinomycetaceae | g__Actinomyces | 1 | 2 | 0 | 0 | 2 | 1 | 0 | 1 | 1 | 3 | 0 | 1 |
| o__Clostridiales | f__Caldicoprobacteraceae | g__Caldicoprobacter | 4 | 2 | 2 | 0 | 4 | 0 | 0 | 1 | 1 | 1 | 1 | 2 |
| o__Clostridiales | f__Peptococcaceae | g__Pelotomaculum | 0 | 0 | 0 | 0 | 0 | 0 | 0 | 0 | 0 | 0 | 0 | 0 |
| o__Clostridiales | f__Clostridiaceae 2 | g__Natronincola | 6 | 6 | 16 | 7 | 1 | 15 | 41 | 19 | 25 | 31 | 13 | 64 |
| o__Micrococcales | f__Micrococcaceae | g__Yaniella | 11 | 8 | 1 | 0 | 2 | 4 | 5 | 5 | 5 | 3 | 1 | 2 |
| o__Lactobacillales | f__Carnobacteriaceae | g__Atopostipes | 4 | 12 | 3 | 6 | 4 | 13 | 10 | 7 | 4 | 1 | 4 | 3 |
| o__Clostridiales | f__Christensenellaceae | g__Christensenellaceae R-7 group | 12 | 5 | 4 | 7 | 3 | 3 | 9 | 8 | 10 | 8 | 4 | 7 |
| o__Clostridiales | f__Ruminococcaceae | g__Fastidiosipila | 13 | 14 | 4 | 3 | 3 | 9 | 11 | 13 | 9 | 9 | 7 | 5 |
| o__Clostridiales | f__Ruminococcaceae | g__Ruminococcus 2 | 1 | 0 | 0 | 1 | 0 | 0 | 0 | 0 | 0 | 0 | 0 | 0 |
| o__Clostridiales | f__Family XIV | g__uncultured | 0 | 3 | 8 | 20 | 79 | 0 | 3 | 1 | 8 | 11 | 3 | 35 |
| o__Pseudomonadales | f__Pseudomonadaceae | g__Pseudomonas | 3 | 0 | 0 | 0 | 0 | 0 | 1 | 0 | 1 | 2 | 1 | 0 |
| o__Corynebacteriales | f__Corynebacteriaceae | g__Corynebacterium 1 | 87 | 98 | 24 | 27 | 58 | 75 | 72 | 43 | 55 | 27 | 36 | 27 |
| o__Pseudomonadales | f__Pseudomonadaceae | g__Pseudomonas | 0 | 0 | 0 | 0 | 1 | 0 | 0 | 0 | 0 | 0 | 0 | 0 |
| o__Anaerolineales | f__Anaerolineaceae | g__T78 | 1 | 0 | 0 | 0 | 0 | 0 | 0 | 0 | 0 | 0 | 0 | 0 |
| o__Clostridiales | f__Lachnospiraceae | g__Lachnoclostridium | 3 | 3 | 2 | 1 | 7 | 5 | 4 | 6 | 4 | 3 | 1 | 3 |
| o__Lactobacillales | f__Carnobacteriaceae | g__Atopostipes | 0 | 0 | 0 | 0 | 1 | 5 | 1 | 2 | 2 | 2 | 0 | 0 |
| o__Clostridiales | f__Christensenellaceae | g__Christensenellaceae R-7 group | 3 | 0 | 0 | 0 | 0 | 2 | 0 | 1 | 1 | 0 | 0 | 0 |
| o__Bacteroidales | f__Porphyromonadaceae | g__uncultured | 8 | 2 | 4 | 1 | 3 | 16 | 19 | 30 | 63 | 50 | 12 | 6 |
| o__Clostridiales | f__Ruminococcaceae | g__Sporobacter | 2 | 0 | 0 | 1 | 1 | 0 | 3 | 1 | 2 | 3 | 3 | 1 |
| o__Bacillales | f__Bacillaceae | g__Bacillus | 1 | 3 | 3 | 0 | 2 | 2 | 0 | 0 | 1 | 0 | 3 | 1 |
| o__Clostridiales | f__Syntrophomonadaceae | g__uncultured | 1 | 1 | 5 | 4 | 15 | 0 | 0 | 0 | 2 | 0 | 0 | 1 |
| o__Burkholderiales | f__Alcaligenaceae | g__Oligella | 0 | 0 | 0 | 0 | 0 | 0 | 1 | 0 | 0 | 0 | 0 | 0 |
| o__Clostridiales | f__Family XIII | g__uncultured | 3 | 6 | 5 | 3 | 2 | 5 | 9 | 6 | 6 | 7 | 4 | 8 |
| o__Bacteroidales | f__PL-11B8 wastewater-sludge group | g__ | 0 | 0 | 0 | 0 | 0 | 1 | 0 | 1 | 0 | 0 | 0 | 0 |
| o__Oceanospirillales | f__SAR86 clade | g__ | 0 | 0 | 0 | 0 | 0 | 0 | 1 | 0 | 0 | 0 | 0 | 0 |
| o__Bacteroidales | f__Marinilabiaceae | g__uncultured | 1 | 2 | 0 | 0 | 1 | 8 | 9 | 9 | 10 | 8 | 1 | 0 |
| o__Clostridiales | f__Ruminococcaceae | g__Ruminiclostridium 9 | 7 | 9 | 7 | 1 | 10 | 1 | 12 | 4 | 10 | 6 | 0 | 0 |
| o__Bacillales | f__Bacillaceae | g__Virgibacillus | 0 | 0 | 0 | 0 | 0 | 2 | 0 | 0 | 0 | 0 | 0 | 1 |
| o__Coriobacteriales | f__Coriobacteriaceae | g__Atopobium | 16 | 12 | 8 | 7 | 15 | 22 | 17 | 16 | 14 | 10 | 13 | 5 |
| o__Planctomycetales | f__Planctomycetaceae | g__Pir4 lineage | 0 | 0 | 0 | 0 | 12 | 0 | 0 | 0 | 0 | 0 | 0 | 0 |
| o__Thermoanaerobacterales | f__Thermoanaerobacteraceae | g__Gelria | 1 | 4 | 1 | 1 | 1 | 1 | 0 | 1 | 5 | 0 | 0 | 2 |
| o__Erysipelotrichales | f__Erysipelotrichaceae | g__Erysipelothrix | 34 | 25 | 10 | 13 | 6 | 38 | 33 | 27 | 32 | 28 | 21 | 21 |
| o__Halanaerobiales | f__Halanaerobiaceae | g__Halocella | 0 | 0 | 0 | 0 | 0 | 0 | 0 | 0 | 0 | 0 | 0 | 0 |
| o__Clostridiales | f__Peptococcaceae | g__Desulfitibacter | 1 | 0 | 0 | 0 | 0 | 0 | 0 | 0 | 0 | 0 | 0 | 1 |
| o__Bacillales | f__Staphylococcaceae | g__Jeotgalicoccus | 16 | 14 | 12 | 14 | 7 | 36 | 35 | 10 | 11 | 18 | 15 | 12 |
| o__Micrococcales | f__Micrococcaceae | g__Enteractinococcus | 3 | 3 | 1 | 1 | 0 | 4 | 2 | 3 | 1 | 2 | 1 | 1 |
| o__Bacteroidales | f__Porphyromonadaceae | g__Petrimonas | 11 | 23 | 13 | 10 | 13 | 6 | 14 | 22 | 30 | 30 | 20 | 4 |
| o__Clostridiales | f__Gracilibacteraceae | g__Gracilibacter | 0 | 0 | 0 | 1 | 0 | 0 | 0 | 0 | 0 | 0 | 0 | 1 |
| o__Clostridiales | f__Family XVIII | g__Symbiobacterium | 5 | 3 | 2 | 0 | 0 | 3 | 7 | 3 | 3 | 3 | 4 | 1 |
| o__Coriobacteriales | f__Coriobacteriaceae | g__Senegalimassilia | 1 | 3 | 1 | 0 | 0 | 0 | 3 | 0 | 0 | 2 | 0 | 3 |
| o__Clostridiales | f__Ruminococcaceae | g__Ruminiclostridium 1 | 1 | 1 | 1 | 0 | 1 | 1 | 1 | 1 | 1 | 0 | 0 | 1 |
| o__Clostridiales | f__Syntrophomonadaceae | g__Dethiobacter | 0 | 0 | 0 | 0 | 0 | 0 | 0 | 0 | 0 | 0 | 0 | 0 |
| o__Clostridiales | f__Ruminococcaceae | g__Ruminococcaceae UCG-010 | 0 | 0 | 0 | 0 | 1 | 0 | 0 | 0 | 0 | 0 | 0 | 0 |
| o__Clostridiales | f__Family XIV | g__uncultured | 40 | 38 | 32 | 44 | 45 | 1 | 19 | 9 | 36 | 22 | 38 | 26 |
| o__Clostridiales | f__Ruminococcaceae | g__Fastidiosipila | 15 | 9 | 4 | 7 | 3 | 19 | 15 | 9 | 8 | 10 | 8 | 7 |
| o__Clostridiales | f__Caldicoprobacteraceae | g__Caldicoprobacter | 22 | 20 | 7 | 10 | 13 | 18 | 9 | 6 | 13 | 17 | 8 | 12 |
| o__Clostridiales | f__Ruminococcaceae | g__uncultured | 0 | 0 | 0 | 0 | 0 | 0 | 0 | 0 | 0 | 0 | 1 | 1 |
| o__Methanobacteriales | f__Methanobacteriaceae | g__Methanobrevibacter | 22 | 27 | 15 | 9 | 8 | 23 | 16 | 19 | 20 | 22 | 7 | 8 |
| o__Lactobacillales | f__Lactobacillaceae | g__Lactobacillus | 4 | 1 | 0 | 1 | 5 | 6 | 3 | 3 | 2 | 3 | 0 | 2 |
| o__Thermoanaerobacterales | f__Thermoanaerobacteraceae | g__Gelria | 56 | 75 | 26 | 62 | 40 | 2 | 17 | 25 | 54 | 53 | 37 | 76 |
| o__Actinomycetales | f__Actinomycetaceae | g__Flaviflexus | 19 | 22 | 7 | 2 | 4 | 28 | 11 | 12 | 17 | 13 | 7 | 4 |
| o__Clostridiales | f__Ruminococcaceae | g__uncultured | 7 | 0 | 0 | 0 | 1 | 2 | 2 | 1 | 6 | 9 | 4 | 4 |
| o__Pseudomonadales | f__Moraxellaceae | g__Acinetobacter | 2 | 2 | 0 | 4 | 12 | 0 | 1 | 0 | 2 | 3 | 5 | 4 |
| o__Clostridiales | f__Caldicoprobacteraceae | g__Caldicoprobacter | 1 | 0 | 1 | 0 | 1 | 0 | 0 | 1 | 0 | 0 | 0 | 0 |
| o__Clostridiales | f__Ruminococcaceae | g__Ruminiclostridium | 0 | 0 | 0 | 3 | 1 | 0 | 0 | 0 | 1 | 1 | 0 | 1 |
| o__Methanobacteriales | f__Methanobacteriaceae | g__Methanobacterium | 20649 | 17562 | 17257 | 25213 | 20251 | 15893 | 25210 | 19836 | 23001 | 21351 | 11469 | 13270 |
| o__Desulfovibrionales | f__Desulfovibrionaceae | g__Desulfovibrio | 0 | 0 | 0 | 0 | 0 | 0 | 0 | 2 | 0 | 0 | 0 | 0 |
| - | - | - | 0 | 1 | 0 | 0 | 0 | 0 | 0 | 0 | 0 | 0 | 0 | 0 |
| o__Clostridiales | f__Ruminococcaceae | g__Ruminococcaceae UCG-010 | 0 | 0 | 0 | 0 | 1 | 0 | 0 | 0 | 0 | 0 | 0 | 0 |
| o__Clostridiales | f__Family XIII | g__Family XIII UCG-002 | 17 | 4 | 13 | 52 | 42 | 4 | 14 | 13 | 22 | 44 | 35 | 40 |
| o__SubsectionI | f__FamilyI | g__Prochlorococcus | 2 | 0 | 0 | 0 | 0 | 0 | 0 | 0 | 0 | 0 | 0 | 0 |
| - | - | - | 0 | 0 | 0 | 1 | 0 | 0 | 0 | 0 | 0 | 0 | 0 | 0 |
| o__Methanomicrobiales | f__Methanospirillaceae | g__Methanospirillum | 0 | 0 | 0 | 1 | 1 | 0 | 0 | 1 | 0 | 0 | 0 | 0 |
| o__Clostridiales | f__Family XI |  | 249 | 301 | 435 | 630 | 305 | 331 | 611 | 429 | 616 | 539 | 406 | 680 |
| o__Hydrogenisporales | f__MBA03 | g__ | 3 | 3 | 0 | 2 | 1 | 4 | 3 | 6 | 8 | 7 | 5 | 5 |
| o__Erysipelotrichales | f__Erysipelotrichaceae | g__Erysipelothrix | 5 | 12 | 7 | 7 | 5 | 19 | 11 | 7 | 14 | 9 | 5 | 5 |
| o__Clostridiales | f__Gracilibacteraceae | g__Lutispora | 17 | 19 | 13 | 17 | 27 | 3 | 22 | 31 | 72 | 96 | 54 | 77 |
| o__Erysipelotrichales | f__Erysipelotrichaceae | g__Turicibacter | 4 | 0 | 4 | 2 | 1 | 1 | 1 | 3 | 4 | 2 | 1 | 5 |
| o__Corynebacteriales | f__Mycobacteriaceae | g__Mycobacterium | 1 | 1 | 0 | 0 | 0 | 0 | 2 | 0 | 0 | 0 | 0 | 0 |
| o__Hydrogenisporales | f__Hydrogenisporaceae | g__ | 0 | 0 | 0 | 0 | 3 | 0 | 0 | 0 | 1 | 4 | 6 | 5 |
| o__Clostridiales | f__Family XI | g__uncultured | 185 | 120 | 42 | 38 | 10 | 323 | 403 | 272 | 357 | 370 | 191 | 198 |
| o__Clostridiales | f__Ruminococcaceae | g__Ruminococcaceae NK4A214 group | 0 | 0 | 0 | 5 | 0 | 4 | 6 | 3 | 4 | 4 | 2 | 6 |
| o__Clostridiales | f__Caldicoprobacteraceae | g__Caldicoprobacter | 0 | 2 | 0 | 0 | 0 | 0 | 0 | 0 | 0 | 0 | 0 | 0 |
| o__Clostridiales | f__Ruminococcaceae | g__uncultured | 1 | 0 | 2 | 1 | 0 | 5 | 4 | 8 | 6 | 1 | 8 | 5 |
| o__Clostridiales | f__Peptococcaceae | g__Thermincola | 0 | 0 | 0 | 0 | 0 | 0 | 0 | 0 | 0 | 2 | 0 | 2 |
| o__Clostridiales | f__Family XII | g__Guggenheimella | 24 | 24 | 14 | 17 | 17 | 39 | 24 | 15 | 29 | 25 | 10 | 22 |
| o__Coriobacteriales | f__Coriobacteriaceae | g__Senegalimassilia | 1 | 3 | 0 | 0 | 0 | 0 | 1 | 0 | 0 | 2 | 0 | 1 |
| o__Corynebacteriales | f__Corynebacteriaceae | g__Corynebacterium 1 | 16 | 19 | 2 | 8 | 7 | 19 | 41 | 29 | 26 | 21 | 25 | 21 |
| o__Bacteroidales | f__PL-11B8 wastewater-sludge group | g__ | 0 | 0 | 0 | 0 | 0 | 3 | 0 | 0 | 0 | 0 | 0 | 0 |
| o__Clostridiales | f__Peptococcaceae | g__Desulfitibacter | 1 | 5 | 0 | 0 | 0 | 2 | 3 | 3 | 1 | 7 | 4 | 11 |
| o__Clostridiales | f__Clostridiales vadinBB60 group | g__ | 6 | 2 | 0 | 0 | 0 | 3 | 2 | 4 | 3 | 4 | 1 | 0 |
| o__Lactobacillales | f__Carnobacteriaceae | g__uncultured | 6 | 12 | 5 | 3 | 4 | 11 | 9 | 3 | 8 | 6 | 4 | 3 |
| o__Thermoanaerobacterales | f__Family III | g__Tepidanaerobacter | 0 | 0 | 0 | 0 | 0 | 0 | 2 | 1 | 0 | 0 | 1 | 0 |
| o__Bacteroidales | f__M2PB4-65 termite group | g__ | 85 | 95 | 31 | 42 | 69 | 90 | 187 | 215 | 241 | 235 | 69 | 69 |
| o__Clostridiales | f__Ruminococcaceae | g__Ruminiclostridium | 2 | 2 | 0 | 3 | 0 | 1 | 2 | 3 | 4 | 1 | 2 | 3 |
| o__Clostridiales | f__Lachnospiraceae | g__Acetitomaculum | 2 | 6 | 2 | 4 | 1 | 6 | 4 | 3 | 7 | 4 | 3 | 2 |
| o__Haloplasmatales | f__Haloplasmataceae | g__Haloplasma | 26 | 23 | 3 | 1 | 0 | 48 | 33 | 28 | 20 | 12 | 6 | 10 |
| o__Clostridiales | f__Ruminococcaceae | g__Candidatus Soleaferrea | 3 | 1 | 2 | 0 | 4 | 4 | 6 | 4 | 10 | 5 | 1 | 5 |
| o__Hydrogenisporales | f__MBA03 | g__ | 5 | 0 | 0 | 0 | 0 | 0 | 3 | 1 | 1 | 1 | 0 | 2 |
| o__Actinomycetales | f__Actinomycetaceae |  | 1 | 1 | 0 | 0 | 0 | 2 | 3 | 0 | 4 | 1 | 2 | 2 |
| o__Bacteroidales | f__Bacteroidales UCG-001 | g__ | 3 | 0 | 0 | 0 | 0 | 2 | 0 | 1 | 0 | 1 | 0 | 0 |
| o__Pseudomonadales | f__Pseudomonadaceae | g__Pseudomonas | 6 | 1 | 0 | 1 | 1 | 6 | 24 | 15 | 69 | 34 | 9 | 20 |
| o__Lactobacillales | f__Lactobacillaceae | g__Lactobacillus | 0 | 0 | 0 | 0 | 0 | 0 | 0 | 1 | 0 | 0 | 0 | 1 |
| o__Bacteroidales | f__Bacteroidaceae | g__Bacteroides | 0 | 2 | 0 | 1 | 3 | 0 | 0 | 0 | 2 | 16 | 6 | 1 |
| o__Hydrogenisporales | f__Hydrogenisporaceae | g__ | 10 | 4 | 7 | 8 | 5 | 6 | 17 | 13 | 17 | 18 | 11 | 22 |
| o__Pseudomonadales | f__Pseudomonadaceae | g__Pseudomonas | 5 | 4 | 13 | 0 | 0 | 2 | 2 | 1 | 1 | 2 | 0 | 0 |
| o__Bacillales | f__Bacillaceae | g__Ureibacillus | 2 | 1 | 1 | 1 | 0 | 48 | 28 | 35 | 130 | 127 | 75 | 457 |
| o__Hydrogenisporales | f__MBA03 | g__ | 0 | 0 | 0 | 0 | 0 | 1 | 1 | 1 | 0 | 1 | 0 | 0 |
| o__Clostridiales | f__Family XI | g__Tepidimicrobium | 0 | 0 | 0 | 0 | 0 | 0 | 0 | 0 | 2 | 0 | 0 | 0 |
| o__Erysipelotrichales | f__Erysipelotrichaceae | g__Erysipelothrix | 4 | 4 | 0 | 3 | 3 | 4 | 2 | 2 | 11 | 8 | 3 | 1 |
| o__Pseudomonadales | f__Moraxellaceae | g__Moraxella | 0 | 0 | 0 | 0 | 0 | 0 | 0 | 0 | 0 | 0 | 0 | 0 |
| o__Clostridiales | f__Family XI | g__Tepidimicrobium | 97 | 83 | 50 | 41 | 20 | 151 | 170 | 140 | 186 | 137 | 52 | 67 |
| o__Bacillales | f__Planococcaceae | g__Solibacillus | 9 | 58 | 0 | 6 | 6 | 12 | 21 | 6 | 2 | 9 | 12 | 2 |
| o__Bacillales | f__Bacillaceae | g__Bacillus | 1 | 1 | 0 | 0 | 0 | 3 | 0 | 0 | 1 | 0 | 0 | 0 |
| o__Subgroup 18 | f__ | g__ | 1 | 3 | 1 | 4 | 13 | 0 | 1 | 0 | 5 | 1 | 0 | 1 |
| o__Clostridiales | f__Caldicoprobacteraceae | g__Caldicoprobacter | 6 | 17 | 3 | 0 | 2 | 6 | 0 | 4 | 6 | 4 | 2 | 1 |
| o__Clostridiales | f__Syntrophomonadaceae | g__A55_D21 | 0 | 0 | 0 | 0 | 0 | 0 | 0 | 0 | 0 | 0 | 0 | 0 |
| o__Thermoanaerobacterales | f__Thermoanaerobacteraceae | g__Syntrophaceticus | 2 | 0 | 0 | 0 | 0 | 0 | 1 | 0 | 0 | 1 | 0 | 1 |
| o__Methanobacteriales | f__Methanobacteriaceae | g__Methanothermobacter | 1 | 5 | 8 | 11 | 7 | 0 | 1 | 1 | 2 | 2 | 2 | 5 |
| o__Thermoplasmatales | f__Thermoplasmatales Incertae Sedis | g__Candidatus Methanoplasma | 0 | 0 | 0 | 0 | 0 | 0 | 0 | 0 | 0 | 2 | 0 | 0 |
| o__Bacillales | f__Paenibacillaceae | g__Paenibacillus | 1 | 2 | 2 | 3 | 2 | 6 | 3 | 4 | 4 | 1 | 1 | 3 |
| o__Clostridiales | f__Lachnospiraceae | g__Lachnospiraceae NK3A20 group | 3 | 3 | 1 | 1 | 2 | 4 | 5 | 3 | 2 | 3 | 2 | 1 |
| o__Clostridiales | f__Caldicoprobacteraceae | g__Caldicoprobacter | 8 | 5 | 0 | 3 | 2 | 2 | 2 | 0 | 2 | 5 | 2 | 4 |
| o__Clostridiales | f__Peptococcaceae | g__uncultured | 4 | 8 | 2 | 11 | 2 | 12 | 14 | 10 | 18 | 9 | 11 | 15 |
| o__Order II | f__Rhodothermaceae | g__uncultured | 0 | 0 | 0 | 0 | 0 | 0 | 0 | 0 | 0 | 0 | 0 | 0 |
| o__Thermoanaerobacterales | f__Thermoanaerobacteraceae | g__Gelria | 110 | 117 | 48 | 52 | 50 | 28 | 72 | 75 | 88 | 99 | 58 | 61 |
| o__Clostridiales | f__Family XI | g__Tissierella | 8 | 11 | 5 | 0 | 3 | 3 | 1 | 0 | 1 | 2 | 0 | 1 |
| o__Clostridiales | f__Family XIII | g__Family XIII AD3011 group | 3 | 4 | 0 | 1 | 2 | 7 | 3 | 4 | 5 | 2 | 3 | 0 |
| o__Clostridiales | f__Lachnospiraceae | g__Acetitomaculum | 3 | 4 | 1 | 0 | 3 | 4 | 3 | 5 | 6 | 1 | 1 | 2 |
| o__Anaerolineales | f__Anaerolineaceae | g__A6 | 0 | 0 | 0 | 0 | 1 | 0 | 0 | 0 | 0 | 0 | 0 | 0 |
| o__Bacteroidales | f__Porphyromonadaceae | g__Petrimonas | 25 | 30 | 13 | 4 | 2 | 51 | 15 | 22 | 34 | 47 | 10 | 6 |
| o__Clostridiales | f__Family XI |  | 5 | 1 | 25 | 9 | 4 | 8 | 44 | 22 | 38 | 39 | 16 | 6 |
| o__Pseudomonadales | f__Pseudomonadaceae | g__Pseudomonas | 15 | 14 | 7 | 6 | 2 | 13 | 21 | 15 | 44 | 15 | 11 | 12 |
| o__Clostridiales | f__Peptococcaceae | g__Cryptanaerobacter | 2 | 2 | 1 | 2 | 8 | 0 | 0 | 1 | 1 | 1 | 1 | 2 |
| o__Campylobacterales | f__Campylobacteraceae | g__Arcobacter | 6 | 0 | 0 | 0 | 0 | 0 | 0 | 0 | 0 | 0 | 0 | 0 |
| o__Clostridiales | f__Caldicoprobacteraceae | g__Caldicoprobacter | 1 | 7 | 0 | 6 | 5 | 12 | 55 | 18 | 41 | 48 | 28 | 14 |
| - | - | - | 3 | 3 | 0 | 0 | 0 | 5 | 5 | 1 | 1 | 2 | 0 | 1 |
| o__Thermoanaerobacterales | f__Thermoanaerobacteraceae | g__Gelria | 10 | 5 | 2 | 10 | 4 | 5 | 16 | 12 | 10 | 5 | 7 | 13 |
| o__Clostridiales | f__Clostridiales vadinBB60 group | g__ | 0 | 0 | 0 | 2 | 1 | 0 | 0 | 1 | 1 | 3 | 3 | 0 |
| o__Clostridiales | f__Christensenellaceae | g__Christensenellaceae R-7 group | 1 | 1 | 0 | 1 | 2 | 0 | 1 | 1 | 1 | 0 | 0 | 1 |
| o__Bacteroidales | f__Porphyromonadaceae |  | 0 | 0 | 0 | 0 | 0 | 2 | 0 | 0 | 0 | 0 | 0 | 0 |
| o__Synergistales | f__Synergistaceae | g__Anaerobaculum | 0 | 0 | 0 | 0 | 0 | 0 | 0 | 0 | 0 | 0 | 0 | 0 |
| o__Clostridiales | f__Eubacteriaceae | g__Garciella | 7 | 0 | 0 | 1 | 1 | 0 | 1 | 0 | 0 | 0 | 0 | 0 |
| o__Coriobacteriales | f__Coriobacteriaceae | g__Denitrobacterium | 2 | 1 | 0 | 1 | 0 | 2 | 0 | 1 | 2 | 0 | 1 | 0 |
| o__Bacillales | f__Bacillaceae | g__Bacillus | 167 | 102 | 66 | 179 | 155 | 474 | 468 | 260 | 283 | 205 | 240 | 173 |
| o__Clostridiales | f__Family XIII | g__Mogibacterium | 106 | 118 | 50 | 68 | 47 | 110 | 91 | 78 | 85 | 78 | 59 | 58 |
| o__Bacillales | f__Bacillaceae | g__Ureibacillus | 8 | 2 | 1 | 0 | 0 | 610 | 57 | 11 | 21 | 3 | 1 | 0 |
| o__Bdellovibrionales | f__Bacteriovoracaceae | g__uncultured | 0 | 0 | 0 | 0 | 1 | 0 | 0 | 0 | 0 | 0 | 0 | 0 |
| o__Bacteroidales | f__Rikenellaceae | g__vadinBC27 wastewater-sludge group | 330 | 207 | 38 | 72 | 182 | 22 | 101 | 168 | 344 | 430 | 180 | 87 |
| o__Fermentibacterales | f__Fermentibacteraceae | g__Candidatus Fermentibacter | 0 | 0 | 0 | 0 | 0 | 0 | 0 | 1 | 0 | 0 | 0 | 0 |
| o__Clostridiales | f__Family XI | g__Tissierella | 11 | 7 | 3 | 2 | 0 | 23 | 82 | 30 | 32 | 16 | 10 | 17 |
| o__Clostridiales | f__Eubacteriaceae | g__Garciella | 15 | 23 | 20 | 6 | 16 | 1 | 2 | 1 | 2 | 2 | 2 | 2 |
| o__Clostridiales | f__Eubacteriaceae | g__Anaerofustis | 0 | 0 | 2 | 1 | 1 | 4 | 3 | 6 | 4 | 5 | 1 | 2 |
| o__Clostridiales | f__Christensenellaceae | g__Christensenellaceae R-7 group | 2 | 4 | 1 | 0 | 0 | 3 | 3 | 2 | 1 | 0 | 2 | 0 |
| o__Bacteroidales | f__Porphyromonadaceae | g__uncultured | 11 | 4 | 2 | 3 | 2 | 4 | 12 | 7 | 18 | 11 | 4 | 2 |
| o__Coriobacteriales | f__Coriobacteriaceae | g__Senegalimassilia | 0 | 0 | 0 | 0 | 0 | 1 | 1 | 0 | 0 | 1 | 0 | 0 |
| o__Rhodocyclales | f__Rhodocyclaceae | g__uncultured | 0 | 0 | 0 | 0 | 1 | 0 | 1 | 1 | 7 | 16 | 2 | 2 |
| o__Clostridiales | f__Ruminococcaceae | g__[Eubacterium] coprostanoligenes group | 11 | 13 | 4 | 8 | 18 | 10 | 11 | 3 | 8 | 11 | 2 | 8 |
| o__Burkholderiales | f__Alcaligenaceae | g__Alcaligenes | 27 | 28 | 0 | 2 | 1 | 73 | 13 | 21 | 10 | 11 | 1 | 1 |
| o__Clostridiales | f__Peptococcaceae | g__uncultured | 1 | 0 | 0 | 0 | 0 | 0 | 1 | 2 | 3 | 5 | 0 | 1 |
| o__Clostridiales | f__Ruminococcaceae | g__Ruminococcaceae UCG-010 | 0 | 0 | 0 | 0 | 0 | 0 | 0 | 0 | 0 | 0 | 0 | 0 |
| o__Rickettsiales | f__SAR116 clade | g__ | 0 | 0 | 0 | 0 | 0 | 0 | 0 | 0 | 0 | 0 | 0 | 0 |
| o__Clostridiales | f__Family XIII | g__Family XIII AD3011 group | 0 | 0 | 1 | 0 | 1 | 2 | 0 | 0 | 0 | 0 | 0 | 0 |
| o__Clostridiales | f__Caldicoprobacteraceae | g__Caldicoprobacter | 1 | 2 | 0 | 0 | 1 | 2 | 7 | 2 | 0 | 3 | 3 | 2 |
| o__Clostridiales | f__Lachnospiraceae | g__[Ruminococcus] gauvreauii group | 5 | 4 | 1 | 5 | 1 | 2 | 2 | 3 | 2 | 5 | 0 | 1 |
| o__Clostridiales | f__Peptococcaceae | g__Dehalobacter | 0 | 0 | 0 | 0 | 0 | 1 | 1 | 0 | 0 | 0 | 0 | 0 |
| o__Coriobacteriales | f__Coriobacteriaceae | g__uncultured | 3 | 0 | 0 | 0 | 2 | 0 | 1 | 1 | 0 | 0 | 1 | 1 |
| o__Clostridiales | f__Ruminococcaceae | g__Fastidiosipila | 21 | 14 | 6 | 5 | 3 | 16 | 13 | 5 | 8 | 11 | 8 | 6 |
| o__Clostridiales | f__Family XI | g__Tepidimicrobium | 2 | 0 | 0 | 0 | 0 | 0 | 0 | 0 | 0 | 0 | 0 | 0 |
| o__Clostridiales | f__Family XI | g__uncultured | 1 | 0 | 2 | 0 | 1 | 7 | 3 | 1 | 7 | 2 | 4 | 5 |
| o__Clostridiales | f__Family XI | g__Tissierella | 0 | 1 | 0 | 0 | 0 | 0 | 0 | 0 | 0 | 0 | 0 | 0 |
| o__Clostridiales | f__Lachnospiraceae | g__Acetitomaculum | 0 | 0 | 0 | 0 | 0 | 0 | 2 | 0 | 0 | 0 | 0 | 0 |
| o__Coriobacteriales | f__Coriobacteriaceae | g__uncultured | 2 | 3 | 2 | 1 | 0 | 1 | 3 | 1 | 0 | 4 | 1 | 0 |
| o__Clostridiales | f__Peptococcaceae | g__Peptococcus | 0 | 1 | 0 | 0 | 1 | 3 | 2 | 0 | 1 | 0 | 2 | 2 |
| o__Clostridiales | f__Lachnospiraceae | g__uncultured | 1 | 1 | 1 | 0 | 1 | 2 | 0 | 0 | 1 | 0 | 0 | 0 |
| o__Clostridiales | f__Ruminococcaceae | g__Ruminiclostridium | 0 | 1 | 0 | 3 | 27 | 0 | 0 | 0 | 2 | 8 | 3 | 2 |
| o__Lactobacillales | f__Carnobacteriaceae | g__Trichococcus | 6 | 5 | 2 | 3 | 2 | 7 | 7 | 4 | 4 | 2 | 0 | 0 |
| o__Clostridiales | f__Ruminococcaceae | g__Ruminiclostridium 1 | 1 | 0 | 0 | 0 | 0 | 0 | 1 | 1 | 1 | 0 | 1 | 1 |
| o__Clostridiales | f__Peptostreptococcaceae | g__Intestinibacter | 0 | 2 | 1 | 2 | 0 | 0 | 1 | 3 | 1 | 1 | 3 | 3 |
| o__Clostridiales | f__Lachnospiraceae | g__Blautia | 1 | 0 | 0 | 0 | 1 | 0 | 1 | 0 | 1 | 0 | 0 | 1 |
| o__Hydrogenisporales | f__Hydrogenisporaceae | g__ | 0 | 0 | 1 | 0 | 0 | 0 | 0 | 0 | 0 | 0 | 0 | 0 |
| o__D8A-2 | f__MRE50b23 | g__B55_F | 2 | 4 | 1 | 0 | 0 | 0 | 1 | 1 | 2 | 0 | 1 | 2 |
| o__Bacteroidales | f__Porphyromonadaceae | g__Proteiniphilum | 4 | 7 | 8 | 12 | 73 | 2 | 2 | 5 | 8 | 12 | 9 | 5 |
| o__Clostridiales | f__Ruminococcaceae |  | 0 | 0 | 1 | 0 | 0 | 0 | 0 | 0 | 2 | 0 | 0 | 0 |
| o__Clostridiales | f__Syntrophomonadaceae | g__A55_D21 | 1 | 0 | 0 | 1 | 0 | 0 | 1 | 0 | 1 | 0 | 1 | 0 |
| o__Coriobacteriales | f__Coriobacteriaceae | g__Atopobium | 27 | 22 | 3 | 10 | 19 | 27 | 22 | 16 | 12 | 17 | 12 | 16 |
| o__Clostridiales | f__Lachnospiraceae | g__Lachnospiraceae NK3A20 group | 3 | 3 | 1 | 1 | 2 | 2 | 0 | 1 | 3 | 1 | 1 | 0 |
| o__Coriobacteriales | f__Coriobacteriaceae | g__uncultured | 1 | 0 | 0 | 0 | 0 | 0 | 0 | 0 | 1 | 0 | 1 | 0 |
| o__Thermoanaerobacterales | f__Thermoanaerobacteraceae | g__Gelria | 0 | 0 | 1 | 0 | 0 | 0 | 0 | 0 | 0 | 0 | 0 | 0 |
| o__D8A-2 | f__MRE50b23 | g__B55_F | 7 | 8 | 10 | 10 | 3 | 5 | 9 | 7 | 4 | 9 | 10 | 5 |
| o__Bacteroidales | f__Porphyromonadaceae | g__Proteiniphilum | 2 | 0 | 0 | 0 | 0 | 5 | 2 | 3 | 3 | 0 | 1 | 0 |
| o__Acholeplasmatales | f__Acholeplasmataceae | g__Acholeplasma | 2 | 1 | 1 | 1 | 0 | 3 | 4 | 5 | 12 | 4 | 13 | 22 |
| o__Clostridiales | f__Christensenellaceae | g__uncultured | 0 | 0 | 0 | 0 | 0 | 0 | 2 | 0 | 0 | 0 | 0 | 0 |
| o__Erysipelotrichales | f__Erysipelotrichaceae | g__Erysipelothrix | 0 | 7 | 2 | 2 | 0 | 4 | 4 | 1 | 3 | 4 | 0 | 0 |
| o__Rhizobiales | f__Brucellaceae | g__Pseudochrobactrum | 10 | 7 | 2 | 1 | 2 | 4 | 6 | 5 | 2 | 1 | 4 | 2 |
| o__Hydrogenisporales | f__Hydrogenisporaceae | g__ | 2 | 0 | 0 | 0 | 0 | 0 | 1 | 1 | 2 | 1 | 1 | 0 |
| o__Bacillales | f__Bacillaceae | g__Bacillus | 24 | 7 | 0 | 1 | 0 | 442 | 44 | 10 | 1 | 3 | 0 | 0 |
| o__Xanthomonadales | f__Xanthomonadaceae | g__Luteimonas | 4 | 2 | 2 | 0 | 5 | 4 | 9 | 9 | 14 | 12 | 3 | 1 |
| o__Bacteroidales | f__Rikenellaceae | g__vadinBC27 wastewater-sludge group | 2 | 3 | 0 | 0 | 4 | 1 | 1 | 0 | 3 | 4 | 0 | 0 |
| o__Clostridiales | f__Christensenellaceae | g__uncultured | 0 | 0 | 0 | 0 | 1 | 0 | 0 | 0 | 1 | 1 | 1 | 0 |
| o__Bacillales | f__Bacillaceae | g__Paucisalibacillus | 3 | 0 | 0 | 0 | 0 | 2 | 1 | 4 | 3 | 1 | 1 | 0 |
| o__Fibrobacterales | f__possible family 01 | g__ | 0 | 0 | 0 | 2 | 25 | 0 | 0 | 0 | 27 | 26 | 1 | 0 |
| o__Clostridiales | f__Family XI | g__Tepidimicrobium | 21 | 9 | 1 | 6 | 3 | 119 | 94 | 64 | 73 | 49 | 30 | 26 |
| o__Clostridiales | f__Peptococcaceae | g__uncultured | 1 | 1 | 1 | 1 | 3 | 0 | 1 | 0 | 1 | 1 | 2 | 2 |
| o__Clostridiales | f__Ruminococcaceae | g__Ruminiclostridium 5 | 2 | 4 | 3 | 3 | 1 | 1 | 2 | 1 | 3 | 1 | 1 | 1 |
| o__Clostridiales | f__Peptococcaceae | g__uncultured | 1 | 0 | 2 | 2 | 1 | 2 | 10 | 4 | 4 | 6 | 4 | 3 |
| o__Clostridiales | f__Lachnospiraceae | g__Pseudobutyrivibrio | 0 | 3 | 2 | 2 | 5 | 7 | 1 | 3 | 6 | 7 | 2 | 1 |
| o__Thermoanaerobacterales | f__SRB2 | g__1-2B-06 | 0 | 0 | 0 | 0 | 0 | 5 | 1 | 3 | 0 | 2 | 1 | 0 |
| o__Clostridiales | f__Ruminococcaceae | g__Ruminococcaceae UCG-014 | 4 | 1 | 4 | 1 | 2 | 5 | 4 | 2 | 2 | 3 | 0 | 1 |
| o__Methanomicrobiales | f__Methanomicrobiaceae | g__Methanoculleus | 1 | 0 | 0 | 2 | 4 | 0 | 0 | 0 | 0 | 0 | 2 | 0 |
| o__Clostridiales | f__Clostridiaceae 4 | g__Clostridium sensu stricto | 2 | 2 | 1 | 0 | 0 | 5 | 8 | 2 | 3 | 1 | 1 | 3 |
| o__Hydrogenisporales | f__Hydrogenisporaceae | g__ | 0 | 0 | 1 | 0 | 0 | 0 | 0 | 0 | 1 | 0 | 0 | 0 |
| o__Clostridiales | f__Family XI | g__uncultured | 15 | 11 | 8 | 7 | 0 | 73 | 76 | 48 | 54 | 58 | 12 | 5 |
| o__Clostridiales | f__Clostridiaceae 1 | g__uncultured | 0 | 0 | 0 | 0 | 0 | 0 | 0 | 0 | 0 | 0 | 0 | 1 |
| o__Clostridiales | f__Christensenellaceae | g__uncultured | 0 | 1 | 1 | 0 | 5 | 0 | 2 | 1 | 1 | 2 | 0 | 2 |
| o__Burkholderiales | f__Alcaligenaceae | g__Pusillimonas | 0 | 2 | 0 | 0 | 0 | 0 | 0 | 0 | 0 | 0 | 0 | 0 |
| o__Clostridiales | f__Ruminococcaceae | g__Ruminiclostridium 1 | 0 | 0 | 1 | 0 | 0 | 0 | 1 | 0 | 0 | 4 | 1 | 6 |
| o__Bacteroidales | f__Rikenellaceae | g__vadinBC27 wastewater-sludge group | 0 | 0 | 0 | 1 | 9 | 0 | 0 | 0 | 1 | 0 | 0 | 1 |
| o__Methanobacteriales | f__Methanobacteriaceae | g__Methanobrevibacter | 1 | 0 | 0 | 0 | 0 | 0 | 0 | 0 | 0 | 0 | 0 | 0 |
| o__Clostridiales | f__Ruminococcaceae | g__Ruminococcaceae UCG-010 | 0 | 0 | 0 | 0 | 0 | 2 | 0 | 0 | 0 | 0 | 0 | 0 |
| o__Clostridiales | f__Clostridiaceae 1 | g__Proteiniclasticum | 16 | 16 | 0 | 11 | 0 | 22 | 10 | 8 | 10 | 8 | 10 | 6 |
| o__Thermoanaerobacterales | f__Thermoanaerobacteraceae | g__Gelria | 1 | 1 | 0 | 1 | 1 | 0 | 1 | 0 | 0 | 0 | 2 | 0 |
| o__Clostridiales | f__Caldicoprobacteraceae | g__Caldicoprobacter | 5 | 4 | 13 | 11 | 5 | 4 | 6 | 11 | 9 | 3 | 7 | 15 |
| o__Verrucomicrobiales | f__Verrucomicrobiaceae | g__Akkermansia | 0 | 0 | 0 | 0 | 2 | 0 | 0 | 0 | 1 | 0 | 0 | 0 |
| o__Clostridiales | f__Family XIII | g__Family XIII UCG-002 | 1 | 0 | 0 | 3 | 0 | 0 | 0 | 0 | 0 | 0 | 0 | 2 |
| o__Clostridiales | f__Family XIII | g__Family XIII UCG-002 | 1 | 1 | 1 | 1 | 7 | 2 | 0 | 6 | 10 | 12 | 6 | 6 |
| o__Bacillales | f__Bacillaceae | g__Bacillus | 8 | 2 | 6 | 7 | 15 | 7 | 0 | 0 | 0 | 1 | 2 | 0 |
| o__Coriobacteriales | f__Coriobacteriaceae | g__Parvibacter | 4 | 4 | 1 | 1 | 2 | 9 | 3 | 1 | 2 | 5 | 3 | 2 |
| o__Clostridiales | f__Peptococcaceae | g__uncultured | 2 | 1 | 0 | 0 | 0 | 0 | 0 | 0 | 0 | 0 | 0 | 0 |
| o__Clostridiales | f__Ruminococcaceae | g__Ruminiclostridium | 0 | 0 | 0 | 0 | 0 | 0 | 0 | 1 | 0 | 0 | 0 | 0 |
| o__Synergistales | f__Synergistaceae | g__uncultured | 4 | 3 | 0 | 0 | 2 | 3 | 2 | 4 | 0 | 1 | 1 | 1 |
| o__Synergistales | f__Synergistaceae | g__Thermovirga | 0 | 1 | 0 | 0 | 0 | 0 | 0 | 2 | 0 | 1 | 0 | 0 |
| o__Clostridiales | f__Ruminococcaceae | g__[Eubacterium] coprostanoligenes group | 0 | 2 | 1 | 0 | 0 | 3 | 0 | 3 | 0 | 0 | 0 | 1 |
| o__Clostridiales | f__Family XIII | g__Family XIII AD3011 group | 18 | 14 | 10 | 19 | 12 | 23 | 23 | 9 | 13 | 21 | 10 | 9 |
| o__Hydrogenisporales | f__Hydrogenisporaceae | g__ | 0 | 0 | 0 | 0 | 1 | 0 | 0 | 0 | 0 | 0 | 0 | 0 |
| o__Lactobacillales | f__Aerococcaceae |  | 1 | 0 | 0 | 1 | 2 | 1 | 4 | 3 | 1 | 0 | 1 | 0 |
| o__Coriobacteriales | f__Coriobacteriaceae | g__Senegalimassilia | 2 | 4 | 0 | 1 | 1 | 0 | 1 | 1 | 0 | 0 | 1 | 2 |
| o__Bacteroidales | f__Porphyromonadaceae | g__Proteiniphilum | 0 | 0 | 0 | 0 | 1 | 0 | 0 | 0 | 0 | 0 | 0 | 0 |
| o__Bacteroidales | f__Porphyromonadaceae | g__Proteiniphilum | 5 | 2 | 0 | 2 | 0 | 6 | 2 | 1 | 3 | 3 | 2 | 3 |
| o__Hydrogenisporales | f__MBA03 | g__ | 161 | 123 | 28 | 69 | 55 | 79 | 155 | 93 | 158 | 173 | 96 | 106 |
| o__Clostridiales | f__Family XI | g__Tepidimicrobium | 60 | 55 | 33 | 27 | 17 | 84 | 178 | 141 | 120 | 83 | 29 | 27 |
| o__Hydrogenisporales | f__MBA03 | g__ | 8 | 13 | 13 | 6 | 3 | 14 | 22 | 9 | 28 | 37 | 25 | 22 |
| o__Clostridiales | f__Caldicoprobacteraceae | g__Caldicoprobacter | 1 | 3 | 1 | 5 | 1 | 3 | 3 | 5 | 14 | 6 | 2 | 11 |
| o__Erysipelotrichales | f__Erysipelotrichaceae | g__Erysipelotrichaceae UCG-004 | 4 | 0 | 0 | 1 | 1 | 1 | 3 | 3 | 5 | 10 | 3 | 5 |
| o__Clostridiales | f__Clostridiaceae 2 | g__Alkaliphilus | 5 | 6 | 13 | 1 | 2 | 7 | 41 | 19 | 4 | 3 | 2 | 1 |
| o__Mollicutes RF9 | f__ | g__ | 0 | 0 | 0 | 0 | 0 | 0 | 0 | 0 | 4 | 15 | 4 | 5 |
| o__Pseudomonadales | f__Pseudomonadaceae | g__Pseudomonas | 0 | 0 | 0 | 1 | 0 | 0 | 1 | 0 | 0 | 0 | 0 | 0 |
| o__NB1-n | f__RFN82 | g__ | 0 | 0 | 0 | 0 | 0 | 0 | 2 | 2 | 2 | 5 | 0 | 0 |
| o__Methanobacteriales | f__Methanobacteriaceae | g__Methanobacterium | 2 | 2 | 2 | 8 | 2 | 0 | 0 | 0 | 0 | 0 | 0 | 1 |
| o__Hydrogenisporales | f__Hydrogenisporaceae | g__ | 2 | 3 | 0 | 0 | 1 | 0 | 2 | 2 | 2 | 4 | 3 | 0 |
| o__Bacteroidales | f__Rikenellaceae | g__vadinBC27 wastewater-sludge group | 0 | 1 | 2 | 2 | 2 | 3 | 9 | 13 | 21 | 22 | 9 | 0 |
| o__Clostridiales | f__Ruminococcaceae | g__uncultured | 0 | 3 | 2 | 0 | 0 | 2 | 3 | 2 | 1 | 0 | 2 | 6 |
| o__Clostridiales | f__Lachnospiraceae | g__Lachnospiraceae NK3A20 group | 1 | 1 | 0 | 0 | 0 | 1 | 4 | 0 | 0 | 0 | 0 | 0 |
| o__Hydrogenisporales | f__MBA03 | g__ | 23 | 16 | 3 | 8 | 7 | 11 | 16 | 15 | 22 | 24 | 9 | 18 |
| o__Bacteroidales | f__Rikenellaceae | g__dgA-11 gut group | 0 | 0 | 0 | 0 | 0 | 0 | 0 | 0 | 0 | 0 | 2 | 0 |
| o__Bacteroidales | f__Porphyromonadaceae | g__Proteiniphilum | 1 | 3 | 1 | 0 | 0 | 9 | 1 | 5 | 6 | 7 | 1 | 0 |
| o__Clostridiales | f__Family XI | g__Tissierella | 2 | 1 | 0 | 0 | 1 | 1 | 0 | 0 | 0 | 1 | 0 | 1 |
| o__Hydrogenisporales | f__Hydrogenisporaceae | g__Hydrogenispora | 0 | 0 | 0 | 0 | 0 | 0 | 0 | 0 | 0 | 0 | 0 | 0 |
| o__Clostridiales | f__Ruminococcaceae | g__uncultured | 0 | 1 | 1 | 2 | 3 | 0 | 0 | 0 | 1 | 1 | 2 | 2 |
| o__Clostridiales | f__Lachnospiraceae | g__[Ruminococcus] gauvreauii group | 7 | 7 | 0 | 0 | 1 | 7 | 6 | 3 | 2 | 2 | 1 | 1 |
| o__Clostridiales | f__Syntrophomonadaceae | g__Dethiobacter | 0 | 0 | 0 | 0 | 0 | 0 | 1 | 0 | 0 | 0 | 0 | 0 |
| o__Campylobacterales | f__Campylobacteraceae | g__Arcobacter | 2 | 0 | 0 | 4 | 0 | 2 | 5 | 5 | 15 | 19 | 13 | 6 |
| o__Clostridiales | f__Ruminococcaceae | g__Ruminococcaceae UCG-005 | 1 | 0 | 0 | 0 | 0 | 4 | 2 | 0 | 1 | 1 | 2 | 0 |
| o__Clostridiales | f__Ruminococcaceae | g__Ruminiclostridium | 0 | 0 | 0 | 0 | 1 | 0 | 0 | 0 | 0 | 0 | 1 | 1 |
| o__Clostridiales | f__Lachnospiraceae | g__[Ruminococcus] gauvreauii group | 3 | 2 | 0 | 1 | 1 | 3 | 0 | 1 | 0 | 0 | 0 | 0 |
| o__Haloplasmatales | f__Haloplasmataceae | g__Haloplasma | 1 | 0 | 0 | 0 | 0 | 0 | 0 | 0 | 0 | 0 | 0 | 0 |
| o__Thermoanaerobacterales | f__Thermoanaerobacteraceae | g__Gelria | 2 | 0 | 2 | 4 | 1 | 0 | 0 | 0 | 1 | 0 | 1 | 0 |
| o__Haloplasmatales | f__Haloplasmataceae | g__Haloplasma | 0 | 0 | 0 | 0 | 0 | 0 | 0 | 2 | 0 | 2 | 0 | 0 |
| o__Methanosarcinales | f__Methanosarcinaceae | g__Methanosarcina | 0 | 3 | 0 | 6 | 30 | 0 | 0 | 0 | 0 | 0 | 0 | 0 |
| o__Corynebacteriales | f__Corynebacteriaceae | g__Corynebacterium 1 | 103 | 95 | 44 | 46 | 78 | 139 | 96 | 50 | 65 | 48 | 50 | 28 |
| o__Clostridiales | f__Family XIII | g__Anaerovorax | 0 | 0 | 0 | 0 | 1 | 2 | 0 | 0 | 0 | 0 | 0 | 0 |
| o__Clostridiales | f__Gracilibacteraceae | g__Gracilibacter | 0 | 0 | 0 | 0 | 0 | 0 | 0 | 0 | 1 | 0 | 0 | 0 |
| o__Clostridiales | f__Family XIII | g__Mogibacterium | 2 | 0 | 1 | 1 | 2 | 3 | 3 | 3 | 2 | 4 | 1 | 0 |
| o__Thermotogales | f__Thermotogaceae | g__Defluviitoga | 0 | 0 | 0 | 0 | 0 | 0 | 0 | 0 | 0 | 0 | 0 | 0 |
| o__Clostridiales | f__Peptostreptococcaceae | g__Peptoclostridium | 0 | 0 | 0 | 0 | 0 | 0 | 2 | 0 | 0 | 0 | 0 | 0 |
| o__Clostridiales | f__Peptostreptococcaceae | g__Romboutsia | 247 | 214 | 110 | 166 | 268 | 258 | 219 | 146 | 156 | 166 | 149 | 190 |
| o__Clostridiales | f__Ruminococcaceae |  | 3 | 0 | 0 | 0 | 1 | 0 | 2 | 0 | 1 | 0 | 0 | 0 |
| o__Ignavibacteriales | f__IheB3-7 | g__ | 0 | 0 | 0 | 0 | 0 | 0 | 0 | 0 | 0 | 0 | 0 | 0 |
| o__Coriobacteriales | f__Coriobacteriaceae |  | 26 | 47 | 11 | 11 | 8 | 26 | 17 | 11 | 17 | 17 | 26 | 16 |
| o__Micrococcales | f__Microbacteriaceae |  | 0 | 1 | 3 | 0 | 1 | 0 | 0 | 1 | 0 | 2 | 1 | 0 |
| o__Clostridiales | f__Caldicoprobacteraceae | g__Caldicoprobacter | 10 | 9 | 6 | 7 | 2 | 9 | 10 | 12 | 16 | 24 | 9 | 21 |
| o__Syntrophobacterales | f__Syntrophaceae | g__Smithella | 0 | 0 | 0 | 0 | 0 | 0 | 0 | 1 | 0 | 0 | 0 | 0 |
| o__Bacteroidales | f__Porphyromonadaceae | g__Petrimonas | 32 | 20 | 8 | 12 | 21 | 62 | 38 | 42 | 62 | 44 | 30 | 27 |
| o__Clostridiales | f__Ruminococcaceae | g__Fastidiosipila | 6 | 1 | 0 | 4 | 3 | 10 | 8 | 5 | 3 | 3 | 2 | 4 |
| o__Clostridiales | f__Family XIII | g__Family XIII AD3011 group | 3 | 6 | 0 | 4 | 2 | 3 | 5 | 4 | 2 | 5 | 5 | 1 |
| o__Clostridiales | f__Ruminococcaceae | g__Ruminococcaceae UCG-010 | 0 | 0 | 0 | 0 | 0 | 0 | 1 | 0 | 2 | 1 | 0 | 0 |
| o__Sphingobacteriales | f__WCHB1-69 | g__G35_D8 | 1 | 2 | 1 | 32 | 83 | 0 | 0 | 1 | 1 | 3 | 10 | 23 |
| o__Coriobacteriales | f__Coriobacteriaceae | g__uncultured | 8 | 19 | 6 | 6 | 3 | 13 | 8 | 8 | 4 | 11 | 9 | 8 |
| o__Bacteroidales | f__Porphyromonadaceae | g__Petrimonas | 90 | 92 | 31 | 26 | 2 | 188 | 107 | 109 | 187 | 197 | 67 | 10 |
| o__Clostridiales | f__Lachnospiraceae | g__Lachnospiraceae NK3A20 group | 143 | 121 | 69 | 91 | 148 | 127 | 141 | 65 | 78 | 92 | 81 | 82 |
| o__Clostridiales | f__Peptostreptococcaceae | g__Intestinibacter | 7 | 8 | 4 | 5 | 8 | 8 | 3 | 6 | 4 | 9 | 3 | 6 |
| o__Clostridiales | f__Family XI | g__uncultured | 3 | 2 | 0 | 3 | 1 | 4 | 6 | 1 | 4 | 1 | 5 | 0 |
| o__Bacillales | f__Bacillaceae | g__uncultured | 3 | 0 | 0 | 1 | 1 | 0 | 1 | 1 | 1 | 0 | 0 | 0 |
| o__Bacteroidales | f__Porphyromonadaceae | g__Proteiniphilum | 29 | 40 | 6 | 4 | 0 | 115 | 36 | 29 | 66 | 81 | 16 | 4 |
| o__Thermoanaerobacterales | f__Thermoanaerobacteraceae | g__Gelria | 0 | 0 | 0 | 0 | 0 | 0 | 0 | 0 | 0 | 0 | 0 | 0 |
| o__Clostridiales | f__Lachnospiraceae | g__Coprococcus 1 | 2 | 0 | 0 | 0 | 0 | 0 | 0 | 0 | 0 | 0 | 0 | 0 |
| o__Clostridiales | f__Peptococcaceae | g__Desulfitibacter | 0 | 0 | 1 | 0 | 0 | 2 | 1 | 0 | 1 | 1 | 0 | 1 |
| o__Clostridiales | f__Lachnospiraceae | g__uncultured | 1 | 3 | 2 | 5 | 2 | 7 | 7 | 3 | 3 | 5 | 3 | 2 |
| o__Clostridiales | f__Syntrophomonadaceae | g__Dethiobacter | 0 | 0 | 0 | 0 | 0 | 0 | 0 | 0 | 0 | 0 | 0 | 0 |
| o__Clostridiales | f__Peptococcaceae | g__Desulfitobacterium | 6 | 1 | 5 | 0 | 1 | 0 | 0 | 1 | 3 | 0 | 0 | 1 |
| o__Clostridiales | f__Lachnospiraceae | g__Howardella | 1 | 1 | 1 | 1 | 1 | 6 | 5 | 0 | 4 | 1 | 3 | 2 |
| o__Erysipelotrichales | f__Erysipelotrichaceae | g__Erysipelothrix | 1 | 0 | 1 | 0 | 0 | 0 | 0 | 1 | 2 | 2 | 0 | 0 |
| o__Lactobacillales | f__Carnobacteriaceae | g__Desemzia | 24 | 27 | 7 | 9 | 13 | 40 | 21 | 18 | 21 | 18 | 9 | 11 |
| o__Pseudomonadales | f__Pseudomonadaceae | g__Pseudomonas | 1026 | 692 | 2018 | 734 | 26 | 213 | 2911 | 2266 | 3983 | 3469 | 1439 | 1183 |
| o__Subgroup 18 | f__ | g__ | 0 | 0 | 0 | 0 | 0 | 0 | 0 | 0 | 0 | 0 | 0 | 0 |
| o__Coriobacteriales | f__Coriobacteriaceae | g__Senegalimassilia | 2 | 0 | 1 | 1 | 2 | 0 | 0 | 0 | 0 | 0 | 1 | 0 |
| o__Clostridiales | f__Family XIII | g__Mogibacterium | 0 | 1 | 0 | 2 | 0 | 3 | 0 | 1 | 1 | 0 | 0 | 0 |
| o__Clostridiales | f__Family XI | g__Tepidimicrobium | 0 | 0 | 0 | 3 | 1 | 0 | 0 | 3 | 1 | 1 | 0 | 3 |
| o__Coriobacteriales | f__Coriobacteriaceae | g__Senegalimassilia | 3 | 13 | 3 | 6 | 4 | 3 | 3 | 1 | 4 | 3 | 3 | 4 |
| o__Clostridiales | f__Family XI | g__Tepidimicrobium | 170 | 148 | 99 | 85 | 28 | 199 | 248 | 182 | 240 | 227 | 155 | 144 |
| o__Clostridiales | f__Peptococcaceae | g__uncultured | 0 | 0 | 0 | 0 | 0 | 2 | 0 | 0 | 3 | 3 | 1 | 5 |
| o__Clostridiales | f__Caldicoprobacteraceae | g__Caldicoprobacter | 1 | 0 | 1 | 1 | 1 | 1 | 0 | 0 | 2 | 0 | 0 | 2 |
| o__Clostridiales | f__Ruminococcaceae | g__[Eubacterium] coprostanoligenes group | 4 | 0 | 4 | 0 | 0 | 0 | 0 | 1 | 0 | 0 | 0 | 0 |
| o__Flavobacteriales | f__Flavobacteriaceae | g__Flavobacterium | 0 | 0 | 0 | 0 | 0 | 0 | 1 | 0 | 0 | 0 | 0 | 0 |
| o__Clostridiales | f__Peptostreptococcaceae | g__Intestinibacter | 118 | 93 | 58 | 67 | 77 | 108 | 92 | 54 | 54 | 77 | 45 | 64 |
| o__Clostridiales | f__Ruminococcaceae | g__Ruminiclostridium | 1 | 0 | 0 | 0 | 0 | 0 | 0 | 0 | 0 | 3 | 2 | 0 |
| o__Burkholderiales | f__Comamonadaceae | g__Acidovorax | 0 | 0 | 0 | 0 | 0 | 0 | 0 | 1 | 0 | 0 | 0 | 0 |
| o__Clostridiales | f__Family XI | g__Tissierella | 6 | 1 | 6 | 3 | 6 | 8 | 19 | 9 | 22 | 15 | 8 | 6 |
| o__Clostridiales | f__Ruminococcaceae | g__Fastidiosipila | 4 | 4 | 2 | 1 | 1 | 5 | 1 | 0 | 3 | 0 | 2 | 2 |
| o__Clostridiales | f__Ruminococcaceae | g__Ruminococcaceae UCG-010 | 14 | 7 | 29 | 57 | 25 | 16 | 23 | 29 | 43 | 65 | 50 | 52 |
| o__Clostridiales | f__Christensenellaceae | g__Christensenellaceae R-7 group | 0 | 0 | 0 | 0 | 0 | 0 | 4 | 0 | 0 | 0 | 0 | 0 |
| o__Pseudomonadales | f__Pseudomonadaceae | g__Pseudomonas | 264 | 100 | 47 | 9 | 14 | 242 | 1521 | 1542 | 2857 | 1965 | 526 | 1090 |
| o__Methanobacteriales | f__Methanobacteriaceae | g__Methanothermobacter | 20 | 32 | 29 | 34 | 32 | 0 | 0 | 1 | 3 | 1 | 12 | 22 |
| o__Spirochaetales | f__Spirochaetaceae | g__Treponema 2 | 10 | 10 | 1 | 1 | 1 | 3 | 6 | 8 | 7 | 2 | 1 | 2 |
| o__Coriobacteriales | f__Coriobacteriaceae | g__Atopobium | 1 | 0 | 0 | 0 | 0 | 1 | 0 | 0 | 2 | 0 | 0 | 1 |
| o__Coriobacteriales | f__Coriobacteriaceae | g__Atopobium | 30 | 21 | 9 | 20 | 16 | 32 | 21 | 20 | 15 | 16 | 9 | 15 |
| o__Clostridiales | f__Lachnospiraceae | g__uncultured | 1 | 0 | 1 | 1 | 1 | 6 | 2 | 1 | 3 | 5 | 6 | 0 |
| o__Anaerolineales | f__Anaerolineaceae | g__uncultured | 0 | 0 | 0 | 0 | 2 | 0 | 0 | 0 | 0 | 0 | 0 | 0 |
| o__Bacteroidales | f__Porphyromonadaceae | g__uncultured | 1 | 1 | 0 | 0 | 0 | 0 | 0 | 2 | 6 | 4 | 3 | 4 |
| o__NB1-n | f__RFN82 | g__ | 26 | 26 | 6 | 14 | 9 | 20 | 47 | 23 | 42 | 37 | 29 | 33 |
| o__Methanomicrobiales | f__Methanomicrobiaceae | g__Methanoculleus | 0 | 1 | 0 | 0 | 0 | 0 | 0 | 0 | 0 | 0 | 0 | 0 |
| o__Clostridiales | f__Christensenellaceae | g__Christensenellaceae R-7 group | 0 | 0 | 0 | 0 | 0 | 3 | 1 | 0 | 1 | 1 | 1 | 0 |
| o__Bacteroidia Incertae Sedis | f__Draconibacteriaceae | g__KD1-22 | 0 | 0 | 0 | 0 | 0 | 0 | 0 | 1 | 0 | 0 | 0 | 0 |
| o__Bacillales | f__Bacillaceae | g__Sinibacillus | 2 | 0 | 1 | 1 | 1 | 1 | 2 | 0 | 3 | 6 | 0 | 4 |
| o__Haloplasmatales | f__Haloplasmataceae | g__Haloplasma | 9 | 13 | 21 | 91 | 36 | 6 | 239 | 230 | 109 | 100 | 109 | 276 |
| o__Rhizobiales | f__Phyllobacteriaceae | g__Aminobacter | 0 | 1 | 0 | 1 | 3 | 1 | 1 | 1 | 0 | 1 | 0 | 3 |
| o__Planctomycetales | f__Planctomycetaceae | g__p-1088-a5 gut group | 0 | 0 | 1 | 0 | 0 | 2 | 1 | 0 | 0 | 0 | 0 | 0 |
| o__Campylobacterales | f__Campylobacteraceae | g__Sulfurospirillum | 0 | 0 | 0 | 0 | 0 | 0 | 0 | 0 | 0 | 0 | 0 | 0 |
| o__Clostridiales | f__Peptostreptococcaceae | g__Peptoclostridium | 206 | 175 | 105 | 124 | 207 | 205 | 170 | 108 | 118 | 126 | 95 | 163 |
| o__Clostridiales | f__Ruminococcaceae | g__Ruminiclostridium 1 | 1 | 1 | 0 | 0 | 0 | 1 | 4 | 2 | 0 | 0 | 0 | 1 |
| o__Spirochaetales | f__Spirochaetaceae | g__Treponema 2 | 0 | 0 | 1 | 0 | 20 | 0 | 0 | 1 | 4 | 13 | 5 | 1 |
| o__Micrococcales | f__Microbacteriaceae | g__Leucobacter | 22 | 17 | 9 | 7 | 11 | 12 | 21 | 14 | 14 | 10 | 9 | 12 |
| o__Methanosarcinales | f__Methanosarcinaceae | g__Methanosarcina | 27 | 12 | 0 | 77 | 490 | 0 | 0 | 0 | 0 | 1 | 5 | 7 |
| o__Bacillales | f__Bacillaceae |  | 0 | 0 | 0 | 0 | 0 | 3 | 0 | 0 | 0 | 0 | 0 | 0 |
| o__Lactobacillales | f__Carnobacteriaceae | g__Desemzia | 0 | 0 | 1 | 1 | 1 | 2 | 1 | 5 | 6 | 1 | 2 | 0 |
| o__Clostridiales | f__Ruminococcaceae | g__Ruminococcaceae UCG-014 | 0 | 0 | 1 | 0 | 0 | 0 | 0 | 0 | 0 | 1 | 0 | 1 |
| o__Methanobacteriales | f__Methanobacteriaceae | g__Methanobacterium | 6 | 4 | 2 | 5 | 5 | 5 | 5 | 4 | 4 | 9 | 2 | 4 |
| o__Clostridiales | f__Syntrophomonadaceae | g__Syntrophomonas | 1 | 4 | 11 | 37 | 16 | 0 | 2 | 0 | 7 | 3 | 13 | 22 |
| o__Clostridiales | f__Ruminococcaceae | g__uncultured | 1 | 1 | 1 | 1 | 0 | 1 | 1 | 0 | 4 | 3 | 5 | 3 |
| o__Clostridiales | f__Christensenellaceae | g__Christensenellaceae R-7 group | 1 | 0 | 2 | 0 | 2 | 0 | 0 | 1 | 0 | 0 | 0 | 0 |
| o__Thermoplasmatales | f__Thermoplasmatales Incertae Sedis | g__Candidatus Methanoplasma | 0 | 0 | 0 | 0 | 0 | 1 | 0 | 0 | 0 | 0 | 0 | 0 |
| o__ | f__ | g__ | 8 | 5 | 3 | 0 | 4 | 0 | 13 | 18 | 60 | 49 | 13 | 4 |
| o__Micrococcales | f__Dermabacteraceae | g__Brachybacterium | 0 | 0 | 1 | 0 | 0 | 1 | 0 | 0 | 1 | 0 | 0 | 0 |
| o__Clostridiales | f__Lachnospiraceae |  | 0 | 0 | 0 | 1 | 0 | 2 | 15 | 9 | 0 | 5 | 4 | 10 |
| o__Clostridiales | f__Ruminococcaceae | g__Ruminococcaceae UCG-014 | 2 | 1 | 0 | 0 | 0 | 0 | 0 | 0 | 3 | 0 | 3 | 0 |
| o__Coriobacteriales | f__Coriobacteriaceae | g__Senegalimassilia | 2 | 7 | 2 | 3 | 1 | 5 | 3 | 2 | 3 | 3 | 2 | 3 |
| o__Clostridiales | f__Caldicoprobacteraceae | g__Caldicoprobacter | 8 | 4 | 1 | 1 | 1 | 6 | 3 | 2 | 4 | 0 | 2 | 3 |
| o__Clostridiales | f__Peptococcaceae |  | 0 | 0 | 0 | 0 | 0 | 1 | 3 | 0 | 0 | 0 | 0 | 0 |
| o__Lactobacillales | f__Carnobacteriaceae | g__Atopostipes | 43 | 41 | 13 | 17 | 12 | 52 | 44 | 23 | 29 | 28 | 13 | 10 |
| o__Clostridiales | f__Ruminococcaceae | g__Fastidiosipila | 9 | 2 | 5 | 3 | 2 | 11 | 10 | 5 | 8 | 10 | 3 | 1 |
| o__Bacteroidales | f__Porphyromonadaceae | g__Proteiniphilum | 0 | 0 | 0 | 0 | 0 | 2 | 1 | 0 | 0 | 1 | 0 | 0 |
| o__Clostridiales | f__Lachnospiraceae | g__[Eubacterium] hallii group | 1 | 1 | 1 | 0 | 0 | 8 | 5 | 2 | 0 | 2 | 2 | 0 |
| o__Halanaerobiales | f__Halanaerobiaceae | g__Halocella | 0 | 0 | 0 | 0 | 0 | 1 | 0 | 0 | 0 | 0 | 0 | 0 |
| o__Clostridiales | f__Family XI | g__Tissierella | 0 | 0 | 1 | 0 | 0 | 3 | 3 | 0 | 0 | 1 | 0 | 2 |
| o__Clostridiales | f__Family XI | g__Tepidimicrobium | 0 | 0 | 0 | 0 | 0 | 0 | 2 | 1 | 0 | 1 | 1 | 0 |
| o__Clostridiales | f__Ruminococcaceae | g__Ruminococcus 2 | 0 | 0 | 0 | 0 | 0 | 1 | 1 | 0 | 1 | 1 | 0 | 0 |
| o__Clostridiales | f__Ruminococcaceae | g__Fastidiosipila | 2 | 7 | 2 | 3 | 3 | 7 | 8 | 7 | 3 | 7 | 8 | 4 |
| o__Thermoanaerobacterales | f__Thermoanaerobacteraceae | g__Syntrophaceticus | 2 | 2 | 2 | 2 | 1 | 0 | 1 | 0 | 1 | 0 | 0 | 6 |
| o__Selenomonadales | f__Acidaminococcaceae | g__Phascolarctobacterium | 4 | 15 | 0 | 1 | 0 | 10 | 11 | 4 | 13 | 16 | 2 | 0 |
| o__NB1-n | f__RFN82 | g__ | 0 | 0 | 1 | 3 | 7 | 0 | 0 | 0 | 2 | 2 | 3 | 1 |
| o__Clostridiales | f__Family XIII | g__Family XIII AD3011 group | 3 | 4 | 4 | 3 | 1 | 3 | 2 | 1 | 2 | 1 | 1 | 3 |
| o__Clostridiales | f__Christensenellaceae | g__Christensenellaceae R-7 group | 1 | 2 | 2 | 0 | 0 | 0 | 0 | 0 | 0 | 0 | 1 | 1 |
| o__Bacteroidales | f__Rikenellaceae | g__Blvii28 wastewater-sludge group | 43 | 27 | 15 | 2 | 0 | 1 | 5 | 5 | 14 | 6 | 7 | 3 |
| o__Clostridiales | f__Peptococcaceae | g__Desulfitibacter | 5 | 0 | 1 | 5 | 9 | 2 | 4 | 8 | 17 | 14 | 7 | 17 |
| o__Coriobacteriales | f__Coriobacteriaceae | g__Slackia | 0 | 1 | 0 | 0 | 0 | 0 | 0 | 0 | 0 | 0 | 2 | 0 |
| o__Clostridiales | f__Family XIII | g__Family XIII UCG-002 | 3 | 2 | 0 | 0 | 2 | 7 | 1 | 4 | 3 | 3 | 0 | 1 |
| o__Thermoanaerobacterales | f__Thermoanaerobacteraceae | g__Gelria | 0 | 0 | 0 | 0 | 0 | 0 | 0 | 0 | 0 | 0 | 0 | 0 |
| o__Micrococcales | f__Microbacteriaceae | g__Pseudoclavibacter | 0 | 0 | 0 | 0 | 0 | 0 | 0 | 0 | 0 | 0 | 0 | 0 |
| o__Bacteroidales | f__Porphyromonadaceae | g__Proteiniphilum | 0 | 0 | 0 | 0 | 1 | 1 | 0 | 2 | 2 | 0 | 0 | 1 |
| o__Coriobacteriales | f__Coriobacteriaceae | g__Atopobium | 1 | 5 | 1 | 1 | 0 | 5 | 1 | 0 | 0 | 0 | 2 | 1 |
| o__Clostridiales | f__Syntrophomonadaceae | g__Dethiobacter | 3 | 1 | 1 | 0 | 6 | 3 | 2 | 1 | 3 | 5 | 6 | 3 |
| o__Clostridiales | f__Ruminococcaceae | g__Ruminiclostridium 1 | 6 | 0 | 0 | 1 | 0 | 1 | 9 | 32 | 51 | 85 | 9 | 3 |
| o__Burkholderiales | f__Alcaligenaceae | g__Advenella | 0 | 0 | 2 | 16 | 2 | 3 | 2 | 7 | 5 | 2 | 4 | 0 |
| o__Haloplasmatales | f__Haloplasmataceae | g__Haloplasma | 0 | 1 | 0 | 0 | 0 | 1 | 1 | 0 | 0 | 0 | 0 | 0 |
| o__Xanthomonadales | f__Xanthomonadaceae | g__Stenotrophomonas | 0 | 0 | 0 | 0 | 0 | 1 | 5 | 5 | 11 | 6 | 2 | 1 |
| o__Clostridiales | f__Family XI | g__Tepidimicrobium | 13 | 1 | 0 | 1 | 1 | 86 | 25 | 8 | 3 | 9 | 1 | 0 |
| o__Desulfovibrionales | f__Desulfovibrionaceae | g__Desulfovibrio | 1 | 2 | 1 | 1 | 3 | 0 | 0 | 0 | 0 | 0 | 0 | 0 |
| o__Clostridiales | f__Ruminococcaceae | g__Ruminococcaceae UCG-014 | 1 | 0 | 0 | 0 | 0 | 0 | 0 | 0 | 0 | 0 | 0 | 0 |
| o__vadinHA17 | f__SHA-94 | g__SHA-94 | 0 | 0 | 0 | 0 | 0 | 0 | 0 | 2 | 0 | 0 | 0 | 0 |
| o__Synergistales | f__Synergistaceae | g__uncultured | 6 | 2 | 2 | 4 | 0 | 0 | 0 | 0 | 0 | 1 | 0 | 0 |
| o__Clostridiales | f__Ruminococcaceae | g__Ruminiclostridium | 0 | 0 | 0 | 0 | 0 | 0 | 0 | 1 | 0 | 2 | 0 | 0 |
| o__Clostridiales | f__Family XI | g__Tepidimicrobium | 1 | 0 | 10 | 6 | 3 | 0 | 2 | 2 | 2 | 0 | 2 | 1 |
| o__Bacillales | f__Bacillaceae | g__Bacillus | 14 | 1 | 0 | 4 | 1 | 6 | 1 | 2 | 3 | 4 | 0 | 0 |
| o__Clostridiales | f__Ruminococcaceae | g__Ruminococcaceae NK4A214 group | 10 | 11 | 0 | 2 | 18 | 13 | 13 | 13 | 13 | 28 | 7 | 3 |
| o__Lactobacillales | f__Streptococcaceae | g__Streptococcus | 1 | 0 | 0 | 1 | 0 | 0 | 1 | 0 | 0 | 0 | 1 | 2 |
| o__Bacteroidales | f__Porphyromonadaceae | g__Petrimonas | 4 | 2 | 3 | 3 | 0 | 7 | 7 | 6 | 8 | 6 | 2 | 0 |
| o__Halanaerobiales | f__Halanaerobiaceae | g__Halocella | 1 | 0 | 1 | 0 | 0 | 2 | 0 | 1 | 0 | 0 | 0 | 0 |
| o__Mollicutes RF9 | f__ | g__ | 0 | 0 | 0 | 1 | 3 | 0 | 0 | 0 | 0 | 0 | 0 | 0 |
| o__Clostridiales | f__Ruminococcaceae | g__uncultured | 26 | 4 | 3 | 7 | 22 | 2 | 2 | 1 | 1 | 12 | 14 | 29 |
| o__Coriobacteriales | f__Coriobacteriaceae | g__uncultured | 4 | 9 | 5 | 1 | 3 | 8 | 6 | 9 | 4 | 3 | 1 | 6 |
| o__Bacillales | f__Staphylococcaceae | g__Salinicoccus | 9 | 7 | 8 | 9 | 5 | 11 | 11 | 6 | 5 | 6 | 5 | 4 |
| o__Clostridiales | f__Family XII | g__Guggenheimella | 10 | 14 | 7 | 7 | 2 | 11 | 10 | 13 | 9 | 9 | 1 | 3 |
| o__Hydrogenisporales | f__MBA03 | g__ | 1 | 1 | 2 | 2 | 0 | 0 | 10 | 4 | 14 | 9 | 1 | 0 |
| o__Hydrogenisporales | f__Hydrogenisporaceae | g__ | 0 | 0 | 0 | 0 | 0 | 0 | 0 | 0 | 0 | 0 | 0 | 0 |
| o__Clostridiales | f__Family XI | g__Sedimentibacter | 5 | 5 | 3 | 3 | 17 | 2 | 8 | 2 | 5 | 7 | 3 | 5 |
| o__Clostridiales | f__Peptococcaceae | g__Peptococcus | 5 | 2 | 5 | 4 | 4 | 5 | 4 | 2 | 5 | 5 | 4 | 0 |
| - | - | - | 3 | 1 | 0 | 0 | 1 | 1 | 0 | 1 | 2 | 0 | 1 | 1 |
| o__Clostridiales | f__Family XI | g__Tepidimicrobium | 0 | 0 | 0 | 0 | 0 | 0 | 0 | 0 | 0 | 0 | 0 | 0 |
| o__Corynebacteriales | f__Corynebacteriaceae | g__Corynebacterium 1 | 45 | 25 | 16 | 17 | 71 | 48 | 60 | 33 | 24 | 23 | 11 | 15 |
| o__Clostridiales | f__Ruminococcaceae | g__uncultured | 0 | 2 | 1 | 10 | 1 | 3 | 3 | 11 | 20 | 31 | 6 | 20 |
| o__Bacteroidales | f__CAP-aah99b04 | g__ | 0 | 0 | 0 | 0 | 0 | 0 | 0 | 0 | 2 | 3 | 0 | 0 |
| o__Clostridiales | f__Family XIII | g__Mogibacterium | 34 | 38 | 21 | 21 | 22 | 40 | 35 | 21 | 35 | 35 | 16 | 18 |
| o__Clostridiales | f__Ruminococcaceae | g__Ruminiclostridium | 2 | 1 | 0 | 0 | 4 | 0 | 0 | 1 | 0 | 4 | 1 | 1 |
| o__Bacillales | f__Paenibacillaceae | g__Desulfuribacillus | 0 | 4 | 2 | 0 | 1 | 0 | 0 | 0 | 1 | 0 | 0 | 0 |
| o__Clostridiales | f__Ruminococcaceae | g__uncultured | 0 | 0 | 0 | 1 | 1 | 0 | 3 | 7 | 11 | 14 | 6 | 0 |
| o__Clostridiales | f__Ruminococcaceae | g__Ruminiclostridium | 12 | 2 | 1 | 1 | 0 | 3 | 2 | 4 | 2 | 6 | 3 | 1 |
| o__Clostridiales | f__Ruminococcaceae | g__[Eubacterium] coprostanoligenes group | 0 | 1 | 0 | 0 | 0 | 0 | 1 | 0 | 0 | 0 | 0 | 0 |
| - | - | - | 75 | 68 | 27 | 52 | 56 | 70 | 112 | 161 | 253 | 265 | 68 | 96 |
| o__Clostridiales | f__Ruminococcaceae | g__Ruminococcaceae UCG-011 | 1 | 4 | 0 | 0 | 0 | 0 | 0 | 0 | 0 | 2 | 2 | 0 |
| o__Clostridiales | f__Christensenellaceae | g__Christensenellaceae R-7 group | 1 | 3 | 0 | 1 | 0 | 2 | 3 | 2 | 2 | 1 | 1 | 0 |
| o__Clostridiales | f__Syntrophomonadaceae | g__A55_D21 | 1 | 0 | 0 | 1 | 0 | 0 | 0 | 1 | 0 | 1 | 0 | 1 |
| o__ | f__ | g__ | 7 | 1 | 0 | 0 | 1 | 0 | 1 | 0 | 2 | 3 | 1 | 0 |
| o__Methanosarcinales | f__Methanosarcinaceae | g__Methanosarcina | 0 | 1 | 0 | 0 | 15 | 0 | 0 | 0 | 0 | 0 | 0 | 0 |
| o__Chthonomonadales | f__ | g__ | 0 | 0 | 0 | 0 | 3 | 0 | 0 | 0 | 0 | 0 | 1 | 0 |
| o__Coriobacteriales | f__Coriobacteriaceae | g__Senegalimassilia | 1 | 0 | 2 | 1 | 0 | 0 | 1 | 0 | 0 | 2 | 1 | 0 |
| o__Coriobacteriales | f__Coriobacteriaceae | g__Paraeggerthella | 6 | 4 | 7 | 7 | 5 | 6 | 7 | 6 | 5 | 7 | 5 | 4 |
| o__Bacteroidia Incertae Sedis | f__Draconibacteriaceae | g__Mariniphaga | 25 | 15 | 5 | 8 | 18 | 0 | 8 | 12 | 23 | 20 | 18 | 11 |
| o__Clostridiales | f__Ruminococcaceae | g__uncultured | 2 | 0 | 0 | 2 | 1 | 1 | 3 | 9 | 8 | 9 | 1 | 3 |
| o__Clostridiales | f__Syntrophomonadaceae | g__Syntrophomonas | 0 | 3 | 0 | 0 | 0 | 0 | 0 | 0 | 0 | 0 | 0 | 0 |
| o__Clostridiales | f__Family XI | g__Tissierella | 40 | 28 | 20 | 5 | 14 | 39 | 10 | 13 | 10 | 11 | 2 | 2 |
| o__Clostridiales | f__Peptococcaceae | g__Pelotomaculum | 0 | 0 | 0 | 1 | 2 | 0 | 0 | 0 | 0 | 0 | 0 | 0 |
| o__Clostridiales | f__Peptococcaceae | g__uncultured | 0 | 0 | 0 | 0 | 0 | 0 | 0 | 0 | 0 | 2 | 0 | 0 |
| o__Clostridiales | f__Peptococcaceae | g__Pelotomaculum | 0 | 0 | 1 | 1 | 0 | 0 | 0 | 0 | 2 | 8 | 1 | 1 |
| o__Rhodobacterales | f__Rhodobacteraceae | g__Pseudorhodobacter | 0 | 0 | 1 | 0 | 0 | 0 | 0 | 0 | 0 | 0 | 0 | 0 |
| o__Pseudomonadales | f__Pseudomonadaceae | g__Pseudomonas | 23 | 24 | 50 | 15 | 0 | 7 | 53 | 50 | 97 | 66 | 36 | 28 |
| o__Unknown Order | f__Unknown Family | g__Candidatus Saccharimonas | 2 | 5 | 4 | 2 | 0 | 5 | 8 | 3 | 9 | 4 | 2 | 1 |
| o__Clostridiales | f__Clostridiaceae 1 | g__Clostridium sensu stricto 1 | 6 | 6 | 7 | 9 | 6 | 15 | 13 | 5 | 8 | 10 | 11 | 11 |
| o__Mollicutes RF9 | f__ | g__ | 0 | 0 | 0 | 0 | 0 | 0 | 0 | 0 | 0 | 0 | 0 | 0 |
| o__Clostridiales | f__Caldicoprobacteraceae | g__Caldicoprobacter | 7 | 3 | 3 | 2 | 2 | 1 | 11 | 3 | 8 | 7 | 5 | 4 |
| o__Clostridiales | f__Christensenellaceae | g__Christensenellaceae R-7 group | 3 | 6 | 4 | 0 | 6 | 1 | 4 | 5 | 3 | 3 | 3 | 2 |
| o__Burkholderiales | f__Alcaligenaceae | g__Advenella | 0 | 0 | 0 | 0 | 0 | 0 | 0 | 0 | 0 | 0 | 0 | 0 |
| o__Clostridiales | f__Family XI | g__Tissierella | 3 | 1 | 1 | 1 | 2 | 3 | 3 | 0 | 0 | 1 | 0 | 0 |
| o__Hydrogenisporales | f__MBA03 | g__ | 25 | 30 | 6 | 20 | 26 | 36 | 37 | 39 | 59 | 66 | 53 | 59 |
| o__Clostridiales | f__Christensenellaceae | g__Christensenellaceae R-7 group | 0 | 1 | 0 | 2 | 0 | 0 | 0 | 0 | 0 | 0 | 0 | 0 |
| o__Clostridiales | f__Clostridiaceae 1 | g__Clostridium sensu stricto 1 | 0 | 0 | 0 | 0 | 0 | 0 | 1 | 0 | 1 | 0 | 0 | 1 |
| o__Bacteroidales | f__Rikenellaceae | g__vadinBC27 wastewater-sludge group | 15 | 19 | 5 | 4 | 2 | 11 | 2 | 1 | 5 | 13 | 2 | 0 |
| o__Methanobacteriales | f__Methanobacteriaceae | g__Methanobacterium | 64 | 129 | 108 | 142 | 78 | 0 | 6 | 7 | 10 | 8 | 20 | 69 |
| o__Thermoanaerobacterales | f__Family III | g__Tepidanaerobacter | 3 | 2 | 4 | 24 | 8 | 0 | 0 | 0 | 9 | 15 | 15 | 33 |
| o__Clostridiales | f__Peptococcaceae | g__Desulfitibacter | 1 | 0 | 2 | 0 | 0 | 0 | 0 | 4 | 0 | 1 | 0 | 2 |
| o__Anaerolineales | f__Anaerolineaceae | g__T78 | 0 | 0 | 0 | 0 | 0 | 0 | 0 | 0 | 0 | 1 | 0 | 0 |
| o__Lactobacillales | f__Aerococcaceae |  | 1 | 6 | 2 | 4 | 1 | 5 | 5 | 2 | 3 | 3 | 3 | 1 |
| o__Bacteroidia Incertae Sedis | f__Draconibacteriaceae | g__Mariniphaga | 14 | 17 | 8 | 18 | 51 | 0 | 1 | 8 | 24 | 31 | 30 | 11 |
| o__Clostridiales | f__Ruminococcaceae | g__Ruminococcaceae UCG-014 | 0 | 0 | 0 | 0 | 0 | 3 | 0 | 0 | 1 | 0 | 0 | 0 |
| o__Hydrogenisporales | f__Hydrogenisporaceae | g__ | 1 | 0 | 0 | 0 | 0 | 0 | 0 | 0 | 0 | 0 | 0 | 0 |
| o__Clostridiales | f__Christensenellaceae | g__Christensenellaceae R-7 group | 3 | 1 | 1 | 3 | 0 | 7 | 5 | 2 | 3 | 1 | 0 | 2 |
| o__Halanaerobiales | f__Halanaerobiaceae | g__Halocella | 0 | 1 | 0 | 0 | 1 | 19 | 1 | 1 | 1 | 0 | 0 | 0 |
| o__Corynebacteriales | f__Dietziaceae | g__Dietzia | 16 | 9 | 6 | 5 | 13 | 13 | 11 | 10 | 3 | 3 | 5 | 0 |
| o__Clostridiales | f__Syntrophomonadaceae | g__Dethiobacter | 0 | 0 | 0 | 0 | 1 | 0 | 0 | 0 | 0 | 1 | 0 | 0 |
| o__Clostridiales | f__Eubacteriaceae | g__Garciella | 7 | 10 | 4 | 12 | 33 | 0 | 1 | 2 | 7 | 2 | 3 | 4 |
| o__Clostridiales | f__Ruminococcaceae | g__Fastidiosipila | 4 | 7 | 8 | 6 | 6 | 13 | 8 | 11 | 15 | 9 | 7 | 7 |
| o__Bacteroidales | f__Marinilabiaceae | g__uncultured | 1 | 1 | 1 | 0 | 0 | 0 | 0 | 1 | 0 | 2 | 0 | 0 |
| o__Clostridiales | f__Eubacteriaceae | g__Alkalibacter | 4 | 2 | 1 | 2 | 1 | 4 | 4 | 1 | 2 | 2 | 3 | 2 |
| o__Clostridiales | f__Lachnospiraceae | g__Coprococcus 1 | 6 | 4 | 0 | 0 | 2 | 6 | 4 | 2 | 5 | 2 | 5 | 1 |
| o__Clostridiales | f__Syntrophomonadaceae | g__Syntrophomonas | 18 | 12 | 32 | 33 | 10 | 2 | 41 | 32 | 29 | 10 | 33 | 47 |
| o__Clostridiales | f__Clostridiaceae 1 | g__Proteiniclasticum | 3 | 2 | 0 | 2 | 9 | 11 | 21 | 8 | 10 | 7 | 0 | 2 |
| o__Clostridiales | f__Clostridiales vadinBB60 group | g__ | 0 | 0 | 0 | 0 | 1 | 0 | 0 | 0 | 7 | 14 | 3 | 1 |
| o__Bacillales | f__Planococcaceae | g__Solibacillus | 1 | 4 | 7 | 1 | 27 | 4 | 22 | 18 | 40 | 19 | 134 | 9 |
| o__Thermoanaerobacterales | f__Thermoanaerobacteraceae | g__Syntrophaceticus | 0 | 0 | 0 | 0 | 0 | 0 | 0 | 0 | 0 | 0 | 0 | 0 |
| o__Bacillales | f__Bacillaceae | g__Oceanobacillus | 0 | 0 | 0 | 0 | 0 | 0 | 0 | 0 | 0 | 0 | 0 | 0 |
| o__Clostridiales | f__Caldicoprobacteraceae | g__Caldicoprobacter | 31 | 20 | 22 | 22 | 45 | 13 | 28 | 37 | 22 | 23 | 23 | 31 |
| o__Thermoanaerobacterales | f__Family III | g__Tepidanaerobacter | 28 | 7 | 2 | 1 | 1 | 51 | 44 | 44 | 48 | 27 | 10 | 20 |
| o__Clostridiales | f__Family XI | g__uncultured | 10 | 4 | 17 | 12 | 11 | 14 | 9 | 9 | 6 | 16 | 8 | 14 |
| o__Bacteroidales | f__Bacteroidaceae | g__Bacteroides | 0 | 0 | 0 | 0 | 0 | 1 | 1 | 0 | 1 | 1 | 0 | 0 |
| o__Planctomycetales | f__Planctomycetaceae | g__p-1088-a5 gut group | 0 | 13 | 16 | 40 | 104 | 0 | 1 | 0 | 6 | 13 | 15 | 5 |
| o__Lactobacillales | f__Aerococcaceae | g__Facklamia | 43 | 52 | 27 | 30 | 46 | 99 | 76 | 46 | 46 | 40 | 27 | 10 |
| o__Clostridiales | f__Caldicoprobacteraceae | g__Caldicoprobacter | 8 | 16 | 3 | 3 | 5 | 15 | 24 | 19 | 16 | 9 | 13 | 6 |
| o__Clostridiales | f__Ruminococcaceae | g__Acetivibrio | 0 | 0 | 1 | 0 | 1 | 0 | 0 | 0 | 0 | 0 | 0 | 0 |
| o__Thermoanaerobacterales | f__SRB2 | g__1-2B-06 | 6 | 8 | 9 | 4 | 0 | 0 | 0 | 3 | 22 | 11 | 8 | 10 |
| o__Clostridiales | f__Eubacteriaceae | g__Garciella | 1 | 4 | 2 | 1 | 2 | 4 | 3 | 2 | 1 | 0 | 0 | 0 |
| o__Clostridiales | f__Ruminococcaceae | g__Ruminococcaceae UCG-001 | 0 | 0 | 0 | 0 | 0 | 0 | 0 | 2 | 1 | 0 | 0 | 0 |
| o__Clostridiales | f__Ruminococcaceae | g__Fastidiosipila | 0 | 1 | 4 | 9 | 23 | 0 | 3 | 0 | 0 | 2 | 4 | 4 |
| o__Clostridiales | f__Caldicoprobacteraceae | g__Caldicoprobacter | 5 | 1 | 2 | 1 | 0 | 3 | 1 | 1 | 0 | 0 | 0 | 0 |
| o__Thermoanaerobacterales | f__Thermoanaerobacteraceae | g__Gelria | 5 | 7 | 1 | 3 | 2 | 0 | 2 | 3 | 1 | 13 | 4 | 2 |
| o__Micrococcales | f__Micrococcaceae | g__Arthrobacter | 0 | 0 | 0 | 0 | 0 | 0 | 1 | 0 | 1 | 0 | 0 | 0 |
| o__Hydrogenisporales | f__Hydrogenisporaceae | g__ | 43 | 49 | 12 | 7 | 7 | 31 | 50 | 40 | 46 | 45 | 20 | 30 |
| o__Clostridiales | f__Lachnospiraceae | g__Lachnospiraceae NK3A20 group | 1 | 0 | 0 | 0 | 0 | 0 | 0 | 0 | 0 | 0 | 0 | 0 |
| o__Clostridiales | f__Ruminococcaceae | g__[Eubacterium] coprostanoligenes group | 0 | 0 | 0 | 0 | 0 | 0 | 2 | 0 | 1 | 1 | 0 | 0 |
| o__Methanobacteriales | f__Methanobacteriaceae | g__Methanothermobacter | 1618 | 3049 | 7423 | 9019 | 9344 | 14 | 255 | 315 | 552 | 918 | 1995 | 6532 |
| o__Clostridiales | f__Ruminococcaceae | g__Ruminiclostridium | 0 | 0 | 0 | 1 | 1 | 3 | 0 | 0 | 2 | 1 | 0 | 0 |
| o__Clostridiales | f__Family XI | g__Tepidimicrobium | 33 | 21 | 14 | 17 | 7 | 58 | 73 | 57 | 70 | 63 | 34 | 24 |
| o__Pseudomonadales | f__Pseudomonadaceae | g__Pseudomonas | 8 | 3 | 1 | 0 | 2 | 4 | 1 | 0 | 2 | 2 | 0 | 0 |
| o__Bacteroidales | f__Porphyromonadaceae | g__Petrimonas | 33 | 19 | 8 | 21 | 26 | 34 | 46 | 31 | 75 | 71 | 41 | 47 |
| o__Clostridiales | f__Eubacteriaceae | g__Acetobacterium | 1 | 0 | 0 | 1 | 1 | 2 | 0 | 0 | 0 | 1 | 0 | 0 |
| o__Hydrogenisporales | f__Hydrogenisporaceae | g__ | 3 | 2 | 0 | 2 | 12 | 2 | 0 | 1 | 0 | 1 | 2 | 0 |
| o__Clostridiales | f__Family XI |  | 1 | 0 | 0 | 0 | 0 | 0 | 2 | 0 | 0 | 0 | 0 | 0 |
| o__Micrococcales | f__Microbacteriaceae | g__Leucobacter | 0 | 5 | 3 | 0 | 3 | 6 | 4 | 2 | 4 | 0 | 3 | 3 |
| - | - | - | 3 | 3 | 0 | 7 | 5 | 7 | 1 | 9 | 7 | 9 | 6 | 4 |
| o__Rhizobiales | f__Hyphomicrobiaceae | g__Pelagibacterium | 1 | 2 | 1 | 0 | 2 | 2 | 0 | 1 | 2 | 3 | 0 | 3 |
| o__Clostridiales | f__Family XIII | g__Family XIII AD3011 group | 4 | 0 | 1 | 0 | 0 | 0 | 2 | 0 | 2 | 0 | 2 | 0 |
| o__Corynebacteriales | f__Corynebacteriaceae | g__Corynebacterium 1 | 50 | 28 | 23 | 39 | 92 | 18 | 150 | 31 | 34 | 72 | 47 | 76 |
| o__Bacteroidales | f__Rikenellaceae | g__Rikenellaceae RC9 gut group | 1 | 0 | 1 | 0 | 0 | 1 | 1 | 0 | 2 | 0 | 0 | 1 |
| o__Clostridiales | f__Lachnospiraceae | g__Roseburia | 1 | 6 | 3 | 2 | 1 | 5 | 1 | 5 | 2 | 1 | 0 | 3 |
| o__Clostridiales | f__Ruminococcaceae | g__Ruminococcaceae UCG-010 | 2 | 1 | 3 | 3 | 13 | 0 | 1 | 2 | 5 | 8 | 2 | 1 |
| o__Acholeplasmatales | f__Acholeplasmataceae | g__Acholeplasma | 0 | 0 | 0 | 0 | 0 | 1 | 2 | 0 | 2 | 2 | 0 | 0 |
| o__Lactobacillales | f__Carnobacteriaceae | g__Lacticigenium | 2 | 1 | 1 | 1 | 0 | 2 | 3 | 0 | 0 | 0 | 0 | 0 |
| o__Synergistales | f__Synergistaceae | g__uncultured | 0 | 0 | 0 | 1 | 0 | 0 | 1 | 0 | 0 | 0 | 0 | 1 |
| o__Clostridiales | f__Family XI | g__uncultured | 0 | 0 | 0 | 0 | 0 | 0 | 0 | 1 | 1 | 0 | 0 | 0 |
| o__Hydrogenisporales | f__Hydrogenisporaceae | g__ | 0 | 0 | 0 | 0 | 0 | 0 | 0 | 0 | 0 | 1 | 0 | 0 |
| o__Clostridiales | f__Peptostreptococcaceae | g__Terrisporobacter | 0 | 0 | 0 | 0 | 1 | 1 | 0 | 0 | 0 | 0 | 0 | 1 |
| o__Clostridiales | f__Christensenellaceae | g__Christensenellaceae R-7 group | 11 | 3 | 2 | 3 | 5 | 1 | 4 | 2 | 6 | 5 | 2 | 5 |
| o__Clostridiales | f__Lachnospiraceae | g__Syntrophococcus | 1 | 0 | 0 | 2 | 1 | 0 | 2 | 1 | 0 | 0 | 0 | 0 |
| - | - | - | 32 | 35 | 10 | 11 | 2 | 34 | 31 | 20 | 38 | 33 | 22 | 13 |
| o__Clostridiales | f__Peptococcaceae | g__Sporotomaculum | 11 | 6 | 1 | 1 | 1 | 0 | 1 | 0 | 0 | 0 | 0 | 0 |
| o__Coriobacteriales | f__Coriobacteriaceae | g__uncultured | 0 | 2 | 1 | 0 | 0 | 0 | 3 | 0 | 0 | 3 | 1 | 0 |
| o__Clostridiales | f__Peptococcaceae | g__uncultured | 1 | 1 | 4 | 2 | 6 | 1 | 2 | 4 | 4 | 6 | 4 | 3 |
| o__Clostridiales | f__Lachnospiraceae | g__Lachnospiraceae NK3A20 group | 121 | 89 | 51 | 58 | 48 | 105 | 82 | 70 | 90 | 85 | 53 | 42 |
| o__Clostridiales | f__Syntrophomonadaceae | g__A55_D21 | 1 | 0 | 0 | 2 | 4 | 0 | 0 | 0 | 0 | 0 | 3 | 1 |
| o__Thermoanaerobacterales | f__Thermoanaerobacteraceae | g__Gelria | 0 | 0 | 0 | 0 | 0 | 0 | 1 | 0 | 1 | 0 | 0 | 0 |
| o__Actinomycetales | f__Actinomycetaceae | g__Trueperella | 8 | 10 | 5 | 8 | 6 | 18 | 20 | 12 | 8 | 10 | 4 | 2 |
| o__Clostridiales | f__Christensenellaceae | g__Christensenellaceae R-7 group | 1 | 0 | 0 | 0 | 0 | 0 | 1 | 0 | 0 | 0 | 0 | 0 |
| o__Clostridiales | f__Family XI | g__Tissierella | 23 | 25 | 12 | 25 | 39 | 35 | 33 | 15 | 30 | 22 | 18 | 20 |
| o__Hydrogenisporales | f__Hydrogenisporaceae | g__ | 2 | 2 | 0 | 0 | 0 | 0 | 0 | 1 | 0 | 1 | 1 | 0 |
| o__Bacillales | f__Bacillaceae | g__Geobacillus | 0 | 0 | 0 | 0 | 0 | 0 | 0 | 0 | 0 | 0 | 0 | 0 |
| o__Clostridiales | f__Peptococcaceae | g__Sporotomaculum | 1 | 0 | 1 | 0 | 0 | 0 | 0 | 0 | 0 | 0 | 0 | 0 |
| o__Clostridiales | f__Clostridiaceae 1 | g__uncultured | 0 | 0 | 0 | 0 | 0 | 0 | 0 | 0 | 0 | 0 | 0 | 0 |
| o__C178B | f__ | g__ | 2 | 1 | 1 | 0 | 0 | 0 | 0 | 1 | 0 | 0 | 0 | 0 |
| o__Bacteroidales | f__Rikenellaceae | g__Blvii28 wastewater-sludge group | 0 | 0 | 0 | 0 | 0 | 0 | 0 | 1 | 0 | 0 | 0 | 0 |
| o__Clostridiales | f__Lachnospiraceae | g__Mobilitalea | 2 | 2 | 0 | 0 | 0 | 1 | 1 | 0 | 0 | 0 | 0 | 0 |
| o__Oceanospirillales | f__Oceanospirillaceae | g__Marinospirillum | 23 | 6 | 3 | 0 | 0 | 0 | 1 | 1 | 0 | 4 | 0 | 0 |
| o__Clostridiales | f__Family XIII | g__Family XIII AD3011 group | 13 | 4 | 1 | 3 | 3 | 12 | 8 | 5 | 7 | 6 | 6 | 4 |
| o__Bacteroidales | f__Porphyromonadaceae | g__Petrimonas | 1 | 0 | 1 | 1 | 0 | 8 | 3 | 5 | 7 | 4 | 0 | 0 |
| o__Methanosarcinales | f__Methanosaetaceae | g__Methanosaeta | 0 | 0 | 0 | 0 | 0 | 0 | 0 | 1 | 0 | 0 | 0 | 0 |
| o__Nitrospirales | f__Nitrospiraceae | g__Nitrospira | 0 | 0 | 0 | 0 | 0 | 0 | 1 | 0 | 0 | 0 | 0 | 0 |
| o__Clostridiales | f__Ruminococcaceae | g__Papillibacter | 0 | 1 | 1 | 0 | 2 | 3 | 0 | 0 | 2 | 3 | 1 | 0 |
| o__Clostridiales | f__Ruminococcaceae | g__Ruminiclostridium 1 | 32 | 17 | 4 | 5 | 3 | 4 | 8 | 11 | 11 | 19 | 0 | 5 |
| o__Erysipelotrichales | f__Erysipelotrichaceae | g__Solobacterium | 2 | 1 | 2 | 3 | 0 | 1 | 5 | 2 | 3 | 1 | 2 | 2 |
| o__Methanomicrobiales | f__Methanomicrobiaceae | g__Methanoculleus | 0 | 0 | 0 | 0 | 1 | 0 | 0 | 0 | 0 | 0 | 0 | 0 |
| o__Clostridiales | f__Peptococcaceae | g__uncultured | 1 | 1 | 1 | 1 | 1 | 0 | 1 | 2 | 3 | 4 | 1 | 0 |
| o__Clostridiales | f__Family XI |  | 1 | 1 | 2 | 0 | 0 | 8 | 4 | 0 | 2 | 8 | 0 | 0 |
| o__Clostridiales | f__Family XIII | g__uncultured | 1 | 2 | 1 | 0 | 1 | 0 | 3 | 0 | 1 | 1 | 0 | 0 |
| o__Clostridiales | f__Syntrophomonadaceae | g__A55_D21 | 2 | 7 | 5 | 4 | 9 | 0 | 0 | 0 | 1 | 1 | 1 | 0 |
| o__Mollicutes RF9 | f__ | g__ | 4 | 2 | 8 | 9 | 20 | 0 | 1 | 3 | 15 | 13 | 13 | 9 |
| o__Clostridiales | f__Lachnospiraceae | g__Lachnospiraceae UCG-002 | 1 | 4 | 3 | 0 | 2 | 1 | 4 | 6 | 3 | 1 | 2 | 1 |
| o__Acholeplasmatales | f__Acholeplasmataceae | g__Acholeplasma | 0 | 0 | 0 | 0 | 0 | 1 | 0 | 0 | 1 | 5 | 0 | 1 |
| o__Erysipelotrichales | f__Erysipelotrichaceae | g__Erysipelothrix | 14 | 9 | 7 | 6 | 10 | 11 | 11 | 11 | 19 | 13 | 8 | 10 |
| o__Burkholderiales | f__Comamonadaceae | g__Pelomonas | 0 | 0 | 0 | 0 | 0 | 0 | 1 | 0 | 0 | 0 | 0 | 0 |
| o__Clostridiales | f__Ruminococcaceae | g__Ruminococcaceae UCG-014 | 0 | 0 | 0 | 0 | 0 | 0 | 0 | 0 | 0 | 0 | 0 | 0 |
| o__Bacteroidales | f__Porphyromonadaceae | g__Petrimonas | 0 | 0 | 0 | 0 | 0 | 2 | 2 | 4 | 1 | 1 | 1 | 0 |
| o__Clostridiales | f__Lachnospiraceae | g__uncultured | 4 | 6 | 12 | 2 | 3 | 11 | 6 | 7 | 3 | 4 | 2 | 3 |
| o__Unknown Order | f__Caldatribacteriaceae | g__HAW-R60 | 1 | 0 | 0 | 1 | 0 | 0 | 0 | 0 | 1 | 0 | 0 | 2 |
| o__Coriobacteriales | f__Coriobacteriaceae | g__Enterorhabdus | 6 | 2 | 0 | 1 | 2 | 3 | 2 | 5 | 1 | 3 | 0 | 0 |
| o__Methanobacteriales | f__Methanobacteriaceae | g__Methanobacterium | 247 | 294 | 326 | 481 | 368 | 96 | 185 | 151 | 202 | 197 | 141 | 143 |
| o__Clostridiales | f__Christensenellaceae | g__Christensenellaceae R-7 group | 0 | 0 | 0 | 0 | 1 | 0 | 2 | 0 | 0 | 0 | 0 | 0 |
| o__Methanobacteriales | f__Methanobacteriaceae | g__Methanobacterium | 512 | 468 | 481 | 632 | 469 | 372 | 597 | 498 | 542 | 514 | 267 | 310 |
| o__Hydrogenisporales | f__MBA03 | g__ | 2 | 1 | 0 | 2 | 0 | 3 | 11 | 3 | 8 | 7 | 3 | 4 |
| - | - | - | 5 | 3 | 1 | 1 | 0 | 8 | 3 | 3 | 4 | 7 | 5 | 2 |
| o__Bacillales | f__Bacillaceae | g__Oceanobacillus | 0 | 0 | 0 | 0 | 1 | 2 | 2 | 0 | 1 | 0 | 0 | 0 |
| o__Clostridiales | f__Christensenellaceae | g__Christensenellaceae R-7 group | 10 | 3 | 1 | 0 | 4 | 11 | 8 | 3 | 3 | 6 | 1 | 3 |
| o__Clostridiales | f__Ruminococcaceae | g__Hydrogenoanaerobacterium | 0 | 0 | 0 | 1 | 4 | 1 | 0 | 2 | 2 | 5 | 2 | 1 |
| o__Thermoanaerobacterales | f__Family III | g__Tepidanaerobacter | 47 | 24 | 42 | 53 | 14 | 26 | 64 | 82 | 143 | 138 | 54 | 61 |
| o__Coriobacteriales | f__Coriobacteriaceae | g__Senegalimassilia | 5 | 5 | 4 | 0 | 2 | 2 | 4 | 0 | 0 | 0 | 4 | 1 |
| o__Lactobacillales | f__Carnobacteriaceae | g__Atopostipes | 3 | 2 | 2 | 0 | 3 | 4 | 7 | 0 | 1 | 2 | 1 | 3 |
| - | - | - | 0 | 0 | 0 | 0 | 0 | 0 | 1 | 3 | 12 | 6 | 0 | 0 |
| o__Clostridiales | f__Ruminococcaceae | g__Ruminiclostridium 5 | 2 | 1 | 1 | 2 | 2 | 2 | 5 | 0 | 3 | 2 | 0 | 3 |
| o__Unknown Order | f__Caldatribacteriaceae | g__HAW-R60 | 0 | 0 | 0 | 0 | 0 | 0 | 0 | 0 | 0 | 0 | 0 | 0 |
| o__Clostridiales | f__Ruminococcaceae | g__Ruminiclostridium 1 | 0 | 0 | 0 | 0 | 0 | 0 | 0 | 0 | 0 | 0 | 0 | 0 |
| o__Clostridiales | f__Clostridiaceae 1 | g__Clostridium sensu stricto 1 | 32 | 23 | 26 | 26 | 39 | 27 | 33 | 29 | 16 | 19 | 21 | 33 |
| o__Clostridiales | f__Ruminococcaceae | g__[Eubacterium] coprostanoligenes group | 3 | 1 | 1 | 0 | 1 | 2 | 1 | 0 | 0 | 0 | 0 | 0 |
| o__Clostridiales | f__Syntrophomonadaceae | g__Dethiobacter | 0 | 0 | 0 | 0 | 2 | 0 | 2 | 0 | 0 | 0 | 0 | 1 |
| o__Clostridiales | f__Peptococcaceae |  | 0 | 0 | 0 | 0 | 2 | 3 | 0 | 0 | 0 | 0 | 0 | 0 |
| o__Clostridiales | f__Christensenellaceae | g__Christensenellaceae R-7 group | 3 | 3 | 2 | 0 | 2 | 1 | 0 | 1 | 3 | 2 | 1 | 3 |
| o__Clostridiales | f__Clostridiales vadinBB60 group | g__ | 0 | 0 | 0 | 0 | 0 | 0 | 0 | 0 | 6 | 2 | 1 | 3 |
| o__Acholeplasmatales | f__Acholeplasmataceae | g__Acholeplasma | 1 | 3 | 0 | 0 | 0 | 4 | 0 | 1 | 3 | 2 | 0 | 0 |
| o__Clostridiales | f__Ruminococcaceae | g__Ruminococcaceae NK4A214 group | 0 | 0 | 0 | 0 | 0 | 0 | 0 | 2 | 0 | 0 | 0 | 0 |
| o__Sphingobacteriales | f__WCHB1-69 | g__G35_D8 | 0 | 0 | 0 | 0 | 2 | 0 | 0 | 0 | 0 | 0 | 1 | 1 |
| o__Clostridiales | f__Clostridiales Incertae Sedis | g__Proteiniborus | 3 | 8 | 44 | 10 | 2 | 0 | 5 | 11 | 33 | 27 | 23 | 39 |
| o__Clostridiales | f__Ruminococcaceae | g__Ruminiclostridium 1 | 0 | 0 | 0 | 0 | 0 | 0 | 1 | 0 | 0 | 0 | 0 | 0 |
| o__Erysipelotrichales | f__Erysipelotrichaceae | g__Solobacterium | 0 | 0 | 1 | 0 | 0 | 1 | 0 | 1 | 0 | 0 | 0 | 0 |
| o__Rhodobacterales | f__Rhodobacteraceae | g__Rhodobacter | 1 | 0 | 0 | 0 | 0 | 0 | 0 | 0 | 0 | 0 | 0 | 0 |
| o__Desulfovibrionales | f__Desulfovibrionaceae | g__Desulfovibrio | 8 | 5 | 0 | 0 | 1 | 7 | 0 | 0 | 1 | 3 | 3 | 0 |
| o__Rhodobacterales | f__Rhodobacteraceae | g__Paracocccus | 2 | 0 | 2 | 0 | 1 | 0 | 2 | 0 | 0 | 1 | 1 | 0 |
| o__Clostridiales | f__Christensenellaceae | g__uncultured | 0 | 3 | 0 | 1 | 4 | 1 | 2 | 0 | 1 | 2 | 3 | 2 |
| o__Methanobacteriales | f__Methanobacteriaceae |  | 4 | 3 | 9 | 13 | 5 | 1 | 2 | 3 | 9 | 12 | 4 | 3 |
| o__Clostridiales | f__Peptostreptococcaceae | g__Romboutsia | 37 | 38 | 23 | 26 | 62 | 42 | 35 | 32 | 21 | 18 | 21 | 27 |
| o__Clostridiales | f__Ruminococcaceae | g__[Eubacterium] coprostanoligenes group | 39 | 22 | 44 | 26 | 72 | 23 | 35 | 39 | 63 | 49 | 45 | 68 |
| o__Lactobacillales | f__Carnobacteriaceae | g__Trichococcus | 0 | 2 | 0 | 2 | 2 | 0 | 1 | 0 | 0 | 1 | 0 | 0 |
| o__Micrococcales | f__Micrococcaceae | g__Micrococcus | 1 | 0 | 0 | 0 | 5 | 0 | 2 | 1 | 0 | 0 | 1 | 0 |
| o__Clostridiales | f__Syntrophomonadaceae | g__A55_D21 | 0 | 0 | 0 | 0 | 0 | 0 | 0 | 0 | 0 | 0 | 0 | 0 |
| o__Clostridiales | f__Christensenellaceae | g__Christensenellaceae R-7 group | 1 | 0 | 0 | 0 | 0 | 0 | 0 | 0 | 0 | 0 | 0 | 0 |
| - | - | - | 0 | 1 | 0 | 2 | 2 | 0 | 2 | 1 | 1 | 5 | 0 | 2 |
| o__Coriobacteriales | f__Coriobacteriaceae | g__uncultured | 0 | 0 | 1 | 0 | 0 | 0 | 1 | 0 | 0 | 1 | 0 | 0 |
| o__Bacillales | f__Bacillaceae | g__Bacillus | 10 | 10 | 3 | 13 | 6 | 8 | 6 | 9 | 13 | 8 | 4 | 2 |
| o__Clostridiales | f__Clostridiales vadinBB60 group | g__ | 2 | 0 | 1 | 6 | 6 | 0 | 1 | 2 | 1 | 2 | 5 | 2 |
| o__Clostridiales | f__Christensenellaceae | g__Christensenellaceae R-7 group | 0 | 0 | 0 | 0 | 0 | 1 | 0 | 0 | 0 | 0 | 0 | 0 |
| o__NB1-n | f__RFN82 | g__ | 29 | 39 | 4 | 113 | 83 | 1 | 8 | 12 | 12 | 17 | 38 | 106 |
| o__Thermoanaerobacterales | f__SRB2 | g__1-2B-06 | 10 | 7 | 15 | 28 | 9 | 37 | 53 | 32 | 40 | 25 | 17 | 12 |
| o__Clostridiales | f__Peptostreptococcaceae | g__Peptoclostridium | 7 | 6 | 1 | 2 | 7 | 7 | 2 | 2 | 4 | 2 | 4 | 9 |
| o__Clostridiales | f__Christensenellaceae | g__Christensenellaceae R-7 group | 6 | 3 | 1 | 2 | 0 | 1 | 1 | 2 | 2 | 1 | 1 | 1 |
| o__Coriobacteriales | f__Coriobacteriaceae |  | 1 | 2 | 1 | 0 | 0 | 0 | 0 | 0 | 0 | 0 | 0 | 0 |
| o__Coriobacteriales | f__Coriobacteriaceae | g__Senegalimassilia | 17 | 25 | 13 | 17 | 6 | 11 | 17 | 8 | 7 | 14 | 24 | 14 |
| o__Clostridiales | f__Peptococcaceae | g__uncultured | 0 | 1 | 2 | 1 | 0 | 0 | 0 | 0 | 0 | 2 | 1 | 0 |
| - | - | - | 2 | 0 | 0 | 1 | 2 | 0 | 0 | 1 | 1 | 1 | 1 | 0 |
| - | - | - | 11 | 5 | 1 | 1 | 2 | 1 | 13 | 5 | 16 | 15 | 1 | 2 |
| o__Clostridiales | f__Family XIII | g__Mogibacterium | 11 | 11 | 7 | 13 | 11 | 14 | 13 | 10 | 11 | 8 | 5 | 5 |
| o__Erysipelotrichales | f__Erysipelotrichaceae | g__Erysipelothrix | 45 | 28 | 11 | 15 | 9 | 43 | 26 | 28 | 32 | 30 | 16 | 25 |
| o__Clostridiales | f__Clostridiaceae 4 | g__Caminicella | 0 | 0 | 0 | 0 | 0 | 0 | 3 | 3 | 1 | 2 | 0 | 1 |
| o__Clostridiales | f__Christensenellaceae | g__Christensenellaceae R-7 group | 2 | 0 | 0 | 1 | 0 | 0 | 1 | 0 | 0 | 2 | 2 | 1 |
| o__Clostridiales | f__Ruminococcaceae | g__Fastidiosipila | 19 | 12 | 9 | 6 | 10 | 2 | 1 | 4 | 2 | 8 | 9 | 7 |
| o__Clostridiales | f__Family XI | g__Tepidimicrobium | 87 | 76 | 61 | 52 | 14 | 62 | 70 | 59 | 88 | 62 | 55 | 40 |
| o__Clostridiales | f__Family XI |  | 6 | 4 | 15 | 8 | 3 | 15 | 39 | 30 | 65 | 99 | 58 | 33 |
| o__Clostridiales | f__Syntrophomonadaceae | g__Syntrophomonas | 0 | 2 | 0 | 1 | 1 | 0 | 0 | 0 | 0 | 0 | 0 | 1 |
| o__Clostridiales | f__Ruminococcaceae | g__Ruminiclostridium 5 | 0 | 1 | 0 | 0 | 0 | 0 | 0 | 2 | 0 | 1 | 0 | 1 |
| - | - | - | 0 | 0 | 0 | 0 | 3 | 0 | 0 | 0 | 0 | 0 | 0 | 0 |
| o__Bacteroidales | f__Porphyromonadaceae | g__Petrimonas | 21 | 19 | 14 | 9 | 11 | 11 | 36 | 24 | 52 | 42 | 19 | 6 |
| o__Clostridiales | f__Ruminococcaceae | g__Ruminiclostridium 1 | 0 | 0 | 0 | 0 | 0 | 1 | 0 | 1 | 0 | 0 | 0 | 1 |
| o__Clostridiales | f__Peptostreptococcaceae | g__Intestinibacter | 1 | 1 | 0 | 0 | 3 | 1 | 0 | 1 | 1 | 2 | 3 | 0 |
| o__C178B | f__ | g__ | 0 | 0 | 0 | 1 | 0 | 0 | 0 | 0 | 0 | 0 | 0 | 0 |
| o__Clostridiales | f__Peptococcaceae | g__uncultured | 0 | 0 | 0 | 0 | 0 | 0 | 0 | 1 | 0 | 0 | 0 | 0 |
| - | - | - | 0 | 1 | 0 | 0 | 0 | 1 | 0 | 1 | 1 | 0 | 0 | 1 |
| o__Clostridiales | f__Family XI | g__H1-814 | 1 | 1 | 0 | 4 | 3 | 0 | 4 | 0 | 2 | 8 | 4 | 10 |
| o__Clostridiales | f__Christensenellaceae | g__Christensenellaceae R-7 group | 2 | 0 | 0 | 0 | 0 | 0 | 1 | 0 | 0 | 0 | 3 | 0 |
| o__Clostridiales | f__Family XI | g__Tissierella | 5 | 1 | 2 | 3 | 11 | 3 | 2 | 0 | 0 | 4 | 1 | 0 |
| o__Clostridiales | f__Caldicoprobacteraceae | g__Caldicoprobacter | 15 | 77 | 47 | 38 | 127 | 4 | 10 | 17 | 27 | 67 | 48 | 44 |
| o__Corynebacteriales | f__Corynebacteriaceae | g__Corynebacterium 1 | 61 | 60 | 31 | 40 | 67 | 72 | 77 | 41 | 44 | 43 | 44 | 25 |
| o__Bacillales | f__Bacillaceae | g__Sinibacillus | 1 | 0 | 0 | 0 | 0 | 5 | 2 | 2 | 2 | 0 | 0 | 0 |
| o__Clostridiales | f__Family XI | g__uncultured | 5 | 6 | 0 | 0 | 0 | 8 | 10 | 6 | 13 | 7 | 5 | 3 |
| o__Clostridiales | f__Caldicoprobacteraceae | g__Caldicoprobacter | 0 | 0 | 0 | 1 | 2 | 0 | 0 | 0 | 0 | 0 | 0 | 1 |
| o__Clostridiales | f__Christensenellaceae | g__Christensenellaceae R-7 group | 0 | 1 | 1 | 1 | 12 | 0 | 0 | 1 | 3 | 1 | 2 | 3 |
| o__Clostridiales | f__Clostridiaceae 2 |  | 0 | 2 | 0 | 0 | 0 | 5 | 6 | 1 | 1 | 0 | 0 | 0 |
| - | - | - | 7 | 3 | 0 | 2 | 0 | 3 | 0 | 2 | 0 | 4 | 0 | 0 |
| o__Clostridiales | f__Gracilibacteraceae | g__Lutispora | 0 | 1 | 2 | 0 | 1 | 0 | 3 | 5 | 12 | 10 | 6 | 1 |
| o__Hydrogenisporales | f__MBA03 | g__ | 11 | 4 | 3 | 7 | 8 | 15 | 14 | 17 | 12 | 33 | 17 | 31 |
| o__Clostridiales | f__Ruminococcaceae | g__Ruminococcaceae UCG-014 | 0 | 0 | 0 | 0 | 0 | 0 | 0 | 0 | 1 | 0 | 0 | 1 |
| o__Clostridiales | f__Lachnospiraceae | g__Lachnoclostridium 5 | 0 | 4 | 3 | 2 | 2 | 2 | 3 | 1 | 1 | 2 | 2 | 2 |
| o__Clostridiales | f__Lachnospiraceae | g__Mobilitalea | 0 | 0 | 0 | 0 | 0 | 1 | 0 | 0 | 0 | 0 | 0 | 0 |
| o__Bacillales | f__Planococcaceae | g__Sporosarcina | 3 | 7 | 2 | 8 | 4 | 13 | 8 | 2 | 6 | 3 | 4 | 1 |
| o__Clostridiales | f__Clostridiaceae 1 | g__Clostridium sensu stricto 1 | 2 | 0 | 0 | 0 | 1 | 1 | 0 | 0 | 0 | 1 | 1 | 1 |
| o__Micrococcales | f__Micrococcaceae | g__Kocuria | 2 | 0 | 0 | 0 | 1 | 0 | 0 | 1 | 0 | 1 | 0 | 1 |
| o__Coriobacteriales | f__Coriobacteriaceae | g__Senegalimassilia | 2 | 1 | 0 | 0 | 0 | 1 | 0 | 0 | 0 | 2 | 0 | 0 |
| o__Clostridiales | f__Lachnospiraceae | g__Mobilitalea | 0 | 1 | 2 | 0 | 0 | 6 | 1 | 1 | 2 | 0 | 0 | 1 |
| o__Clostridiales | f__Family XI | g__uncultured | 19 | 16 | 8 | 13 | 4 | 27 | 23 | 15 | 21 | 24 | 12 | 9 |
| o__Clostridiales | f__Ruminococcaceae | g__Ruminococcus 2 | 0 | 1 | 1 | 0 | 1 | 1 | 0 | 1 | 0 | 0 | 1 | 1 |
| o__Clostridiales | f__Christensenellaceae | g__Christensenellaceae R-7 group | 36 | 31 | 10 | 5 | 6 | 28 | 16 | 10 | 18 | 15 | 6 | 5 |
| o__Acholeplasmatales | f__Acholeplasmataceae | g__Acholeplasma | 1 | 3 | 0 | 0 | 0 | 6 | 0 | 2 | 0 | 2 | 2 | 0 |
| o__Clostridiales | f__Ruminococcaceae | g__Fastidiosipila | 0 | 1 | 0 | 0 | 0 | 0 | 1 | 0 | 0 | 1 | 0 | 0 |
| o__Bacteroidales | f__Marinilabiaceae | g__Ruminofilibacter | 26 | 14 | 3 | 9 | 74 | 14 | 5 | 17 | 16 | 21 | 7 | 3 |
| o__Haloplasmatales | f__Haloplasmataceae | g__Haloplasma | 1 | 4 | 0 | 0 | 0 | 0 | 1 | 1 | 2 | 0 | 1 | 0 |
| o__Clostridiales | f__Ruminococcaceae | g__Ruminococcaceae NK4A214 group | 11 | 4 | 10 | 4 | 1 | 6 | 13 | 6 | 27 | 22 | 4 | 4 |
| o__Clostridiales | f__Lachnospiraceae | g__Mobilitalea | 4 | 1 | 0 | 0 | 0 | 4 | 2 | 3 | 4 | 3 | 2 | 0 |
| o__Clostridiales | f__Ruminococcaceae | g__[Eubacterium] coprostanoligenes group | 0 | 0 | 0 | 0 | 1 | 1 | 0 | 1 | 0 | 0 | 0 | 0 |
| o__Clostridiales | f__Gracilibacteraceae | g__Lutispora | 2 | 1 | 5 | 1 | 1 | 0 | 0 | 0 | 1 | 2 | 0 | 0 |
| o__Methanobacteriales | f__Methanobacteriaceae | g__Methanothermobacter | 24 | 75 | 172 | 201 | 214 | 0 | 6 | 3 | 10 | 20 | 47 | 162 |
| o__Thermoanaerobacterales | f__Thermoanaerobacteraceae | g__Gelria | 3 | 1 | 6 | 3 | 25 | 0 | 0 | 1 | 9 | 10 | 7 | 13 |
| o__Clostridiales | f__Family XIII | g__Mogibacterium | 2 | 0 | 0 | 0 | 0 | 0 | 0 | 0 | 0 | 0 | 0 | 0 |
| o__Clostridiales | f__Ruminococcaceae | g__Ruminococcus 2 | 0 | 1 | 0 | 0 | 0 | 0 | 0 | 0 | 0 | 0 | 0 | 0 |
| o__Bacteroidales | f__Porphyromonadaceae | g__Proteiniphilum | 1 | 0 | 0 | 0 | 0 | 3 | 0 | 0 | 0 | 0 | 0 | 0 |
| o__Bacteroidales | f__Bacteroidaceae | g__Bacteroides | 1 | 1 | 0 | 0 | 0 | 0 | 0 | 0 | 0 | 0 | 1 | 0 |
| o__Clostridiales | f__Christensenellaceae | g__Christensenellaceae R-7 group | 0 | 0 | 0 | 0 | 1 | 0 | 0 | 0 | 1 | 0 | 0 | 0 |
| o__Clostridiales | f__Ruminococcaceae | g__Ruminococcus 1 | 0 | 1 | 0 | 0 | 1 | 0 | 0 | 0 | 0 | 0 | 0 | 0 |
| o__Thermoanaerobacterales | f__Family III | g__Tepidanaerobacter | 1 | 0 | 0 | 2 | 0 | 0 | 0 | 1 | 0 | 1 | 2 | 3 |
| o__Bacillales | f__Planococcaceae | g__Sporosarcina | 1 | 2 | 0 | 0 | 0 | 2 | 0 | 0 | 1 | 2 | 0 | 0 |
| o__vadinHA17 | f__ | g__ | 0 | 1 | 0 | 0 | 4 | 0 | 0 | 0 | 1 | 1 | 1 | 0 |
| o__Clostridiales | f__Lachnospiraceae | g__Lachnospiraceae NK3A20 group | 0 | 0 | 0 | 0 | 0 | 2 | 1 | 1 | 0 | 1 | 0 | 3 |
| o__Clostridiales | f__Ruminococcaceae | g__Fastidiosipila | 5 | 1 | 1 | 1 | 0 | 4 | 1 | 3 | 3 | 4 | 0 | 0 |
| o__Clostridiales | f__Christensenellaceae | g__Christensenellaceae R-7 group | 0 | 0 | 0 | 0 | 0 | 0 | 0 | 2 | 0 | 0 | 0 | 0 |
| o__Clostridiales | f__Ruminococcaceae | g__Ruminiclostridium 1 | 2 | 0 | 1 | 3 | 3 | 0 | 0 | 0 | 4 | 6 | 3 | 0 |
| o__Clostridiales | f__Clostridiaceae 2 | g__Natronincola | 0 | 0 | 0 | 2 | 0 | 1 | 2 | 2 | 8 | 15 | 6 | 13 |
| o__Methanomicrobiales | f__Methanocorpusculaceae | g__Methanocorpusculum | 1 | 1 | 2 | 0 | 0 | 1 | 0 | 0 | 0 | 0 | 0 | 0 |
| o__Synergistales | f__Synergistaceae | g__uncultured | 1 | 2 | 0 | 10 | 3 | 0 | 1 | 0 | 1 | 6 | 0 | 3 |
| o__Clostridiales | f__Ruminococcaceae | g__Ruminococcaceae UCG-010 | 4 | 2 | 2 | 0 | 3 | 4 | 3 | 5 | 3 | 4 | 5 | 3 |
| o__Clostridiales | f__Ruminococcaceae | g__Ruminococcaceae NK4A214 group | 1 | 5 | 2 | 1 | 1 | 3 | 0 | 0 | 0 | 1 | 0 | 0 |
| o__Clostridiales | f__Lachnospiraceae | g__Lachnospiraceae NK3A20 group | 0 | 0 | 0 | 0 | 0 | 0 | 0 | 0 | 0 | 0 | 0 | 0 |
| o__Clostridiales | f__Caldicoprobacteraceae | g__Caldicoprobacter | 12 | 25 | 10 | 57 | 70 | 1 | 0 | 8 | 12 | 54 | 52 | 113 |
| o__Anaerolineales | f__Anaerolineaceae | g__RB349 | 1 | 3 | 2 | 3 | 2 | 0 | 0 | 0 | 0 | 1 | 1 | 0 |
| o__Clostridiales | f__Family XIII | g__Family XIII UCG-002 | 1 | 2 | 4 | 6 | 0 | 0 | 5 | 0 | 1 | 5 | 0 | 0 |
| o__Clostridiales | f__Family XI | g__Tissierella | 3 | 4 | 3 | 2 | 5 | 1 | 0 | 0 | 2 | 1 | 0 | 1 |
| o__Clostridiales | f__Lachnospiraceae | g__Lachnospiraceae NK3A20 group | 71 | 63 | 35 | 40 | 49 | 63 | 52 | 43 | 54 | 40 | 30 | 33 |
| o__Planctomycetales | f__Planctomycetaceae | g__Pirellula | 0 | 0 | 0 | 0 | 0 | 0 | 0 | 0 | 0 | 1 | 0 | 0 |
| o__Pseudomonadales | f__Pseudomonadaceae | g__Pseudomonas | 0 | 0 | 0 | 0 | 0 | 0 | 0 | 0 | 0 | 0 | 0 | 1 |
| o__Propionibacteriales | f__Nocardioidaceae | g__Marmoricola | 3 | 1 | 0 | 0 | 1 | 2 | 1 | 1 | 0 | 0 | 1 | 1 |
| o__Pseudomonadales | f__Pseudomonadaceae | g__Pseudomonas | 1 | 2 | 0 | 0 | 0 | 0 | 0 | 0 | 2 | 0 | 2 | 1 |
| o__Bacteroidales | f__Rikenellaceae | g__Rikenellaceae RC9 gut group | 0 | 0 | 0 | 0 | 0 | 0 | 0 | 0 | 0 | 2 | 0 | 0 |
| o__Acholeplasmatales | f__Acholeplasmataceae | g__Acholeplasma | 10 | 5 | 1 | 6 | 2 | 13 | 11 | 7 | 23 | 22 | 14 | 11 |
| o__Oceanospirillales | f__Halomonadaceae | g__Halomonas | 0 | 0 | 0 | 0 | 0 | 2 | 0 | 2 | 2 | 5 | 0 | 0 |
